# Supplementary material for: A publicly available crystallisation data set and its application in machine learning
Source: Royal Society of Chemistry journal article supplement (doi:10.1039/c7ce00738h), 2017-01-01
Supplement: c7ce00738h6.csv [file c7ce00738h6.csv]

PID	SMILES	Cluster	Number	S-MeOH	S-EtOH	S-NiMe	S-ACT	S-DMF	S-iBMK	S-EA	S-tBME	S-MCB	S-CHCl3	S-TOL	S-ACN	S-iPrOH	S-EMK	S-THF	S-DCM	S-DEE	S-HEX	C-MeOH	C-EtOH	C-NiMe	C-ACT	C-DMF	C-iBMK	C-EA	C-tBME	C-MCB	C-CHCl3	C-TOL	C-ACN	C-iPrOH	C-EMK	C-THF	C-DCM	C-DEE	C-HEX	Purity
OX-0001	O=C(N[C@H](Cc1ccccc1)C(=O)O)OCc1ccccc1	1	1	RS	RS	RS	RS	RS	RS	RS	KS	RS	RS	RS	RS	RS	RS	RS	RS	TS	PS	CT	CT	DR	CT	CT	CT	CT	CT	CT	CT	YX	CT	XX	CT	CT	CT	CT	YX	99
OX-0002	CC(C)SC(NC(=O)OCc1ccccc1)C(=O)O	1	2	KS	KS	TS	RS	RS	KS	KS	TS	RS	TS	RS	RS	TS	RS	RS	TS	PS	PS	XX	XX	XX	XX	XX	XX	CT	XX	XX	XX	XX	CT	XX	XX	CT	XX	XX	YX	99
OX-0003	COC(=O)[C@H](CC#N)NC(=O)OCc1ccccc1	1	3	RS	RS	RS	RS	RS	RS	RS	KS	RS	RS	RS	RS	RS	RS	RS	RS	RS	TS	YX	CT	CT	YX	YX	YX	CT	XX	XX	XX	XX	CT	CT	FI	YX	XX	YX	XX	99
OX-0004	O=C(N[C@@H](Cc1ccccc1)C(=O)OCc1ccccc1)OCc1ccccc1	1	4	RS	RS	RS	RS	RS	RS	RS	RS	RS	RS	RS	RS	KS	RS	RS	RS	RS	TS	FI	FI	AM	FI	FI	FI	FI	FI	FI	CT	DR	FI	FI	FI	FI	FI	FI	FI	99
OX-0005	CN(C)CC(C)(C)CNCCCOc1ccc(C[C@H](NC(=O)OCc2ccccc2)C(=O)O)cc1	1	5	RS	TS	TS	PS	TS	PS	PS	PS	PS	RS	PS	RS	TS	PS	TS	RS	PS	PS	FI	FI	XX	XX	XX	FI	DR	DR	YX	FI	CT	XX	CT	AM	AM	YX	YX	DR	99
OX-0006	CC(C)(C)C(NC(=O)OCc1ccccc1)C(=O)O	1	6	RS	RS	RS	RS	RS	RS	RS	RS	RS	RS	RS	RS	RS	RS	RS	RS	RS	TS	FI	FI	FI	FI	FI	FI	CT	FI	FI	FI	FI	FI	FI	FI	FI	AM	FI	XX	99
OX-0007	CC(NC(=O)OCc1ccccc1)C(=O)O	1	7	RS	RS	RS	RS	RS	RS	RS	RS	TS	RS	RS	RS	RS	RS	RS	RS	RS	PS	XX	CT	XX	YX	CT	XX	XX	XX	XX	XX	YX	CT	CT	CT	CT	XX	XX	DR	99
OX-0008	CC(C)(C)NCCCOc1ccc(C[C@H](NC(=O)OCc2ccccc2)C(=O)O)cc1	1	8	PS	PS	PS	PS	TS	PS	PS	PS	RS	RS	RS	PS	PS	RS	RS	RS	PS	PS	XX	XX	DR	YX	YX	DR	DR	YX	DR	CT	CT	YX	XX	YX	YX	AM	DR	DR	99
OX-0009	O=C(N[C@@H](Cc1ccccc1)C(O)C(=O)O)OCc1ccccc1	1	9	KS	TS	TS	RS	RS	TS	TS	PS	PS	PS	PS	KS	KS	RS	RS	PS	PS	PS	XX	XX	XX	XX	XX	XX	XX	CT	DR	CT	DR	XX	XX	CT	XX	DR	DR	DR	99
OX-0010	CC(C)C[C@H](NC(=O)OCc1ccccc1)C(=O)O	1	10	NA	NA	NA	NA	NA	NA	NA	NA	NA	NA	NA	NA	NA	NA	NA	NA	NA	NA	NA	NA	NA	NA	NA	NA	NA	NA	NA	NA	NA	NA	NA	NA	NA	NA	NA	NA	NA
OX-0011	COC(=O)[C@H](CC(N)=O)NC(=O)OCc1ccccc1	1	11	NA	NA	NA	NA	NA	NA	NA	NA	NA	NA	NA	NA	NA	NA	NA	NA	NA	NA	NA	NA	NA	NA	NA	NA	NA	NA	NA	NA	NA	NA	NA	NA	NA	NA	NA	NA	NA
OX-0012	O=C(N[C@H](CO)C(=O)O)OCc1ccccc1	1	12	NA	NA	NA	NA	NA	NA	NA	NA	NA	NA	NA	NA	NA	NA	NA	NA	NA	NA	NA	NA	NA	NA	NA	NA	NA	NA	NA	NA	NA	NA	NA	NA	NA	NA	NA	NA	NA
OX-0013	O=C(N[C@@H](CO)C(=O)O)OCc1ccccc1	1	13	RS	KS	TS	KS	RS	TS	KS	PS	PS	PS	PS	KS	KS	RS	RS	PS	PS	PS	CT	CT	XX	CT	CT	XX	XX	XX	CT	YX	YX	XX	CT	XX	XX	YX	XX	DR	99
OX-0014	CC(C)C[C@H](NC(=O)[C@H](CC(C)C)NC(=O)OCc1ccccc1)C(=O)O	1	14	RS	RS	RS	RS	RS	RS	RS	RS	RS	TS	TS	RS	RS	RS	RS	RS	RS	PS	FI	CT	FI	CT	FI	CT	FI	CT	XX	XX	XX	FI	FI	FI	CT	CT	AM	DR	99
OX-0015	O=C(O)CC(NC(=O)OCc1ccccc1)C(=O)O	1	15	TS	PS	PS	PS	TS	PS	PS	PS	PS	PS	PS	PS	TS	KS	RS	PS	PS	PS	CT	CT	CT	CT	CT	CT	CT	CT	YX	YX	YX	CT	YX	CT	AM	CT	XX	DR	99
OX-0016	COC(=O)CNC(=O)[C@H](Cc1ccccc1)NC(=O)OCc1ccccc1	1	16	NA	NA	NA	NA	NA	NA	NA	NA	NA	NA	NA	NA	NA	NA	NA	NA	NA	NA	NA	NA	NA	NA	NA	NA	NA	NA	NA	NA	NA	NA	NA	NA	NA	NA	NA	NA	NA
OX-0017	O=C(N[C@@H](Cc1c[nH]c2ccccc12)C(=O)O)OCc1ccccc1	1	17	TS	RS	RS	RS	RS	RS	RS	RS	PS	TS	PS	RS	RS	RS	RS	RS	KS	PS	FI	CT	XX	CT	FI	YX	CT	CT	XX	XX	YX	AM	CT	FI	AM	CT	CT	DR	99
OX-0018	NC(=O)CC(NC(=O)OCc1ccccc1)C(=O)O	1	18	RS	KS	TS	KS	RS	PS	PS	PS	PS	PS	PS	TS	TS	KS	RS	PS	PS	PS	XX	XX	XX	XX	CT	XX	XX	YX	YX	YX	YX	XX	XX	XX	XX	CT	YX	YX	99
OX-0019	O=C(N[C@H](Cc1ccccc1)C(=O)N[C@@H](CSCc1ccccc1)C(=O)O)OCc1ccccc1	1	19	TS	TS	RS	RS	RS	RS	RS	RS	RS	RS	TS	RS	TS	RS	RS	RS	KS	PS	CT	CT	CT	CT	CT	CT	CT	CT	CT	AM	CT	FI	CT	AM	DR	AM	CT	DR	99
OX-0020	CC[C@H](C)[C@H](NC(=O)OCc1ccccc1)C(=O)O	1	20	RS	RS	RS	RS	RS	RS	RS	RS	RS	RS	RS	RS	RS	RS	RS	RS	RS	TS	AM	FI	FI	FI	FI	FI	FI	FI	FI	FI	FI	FI	FI	FI	AM	AM	FI	FI	99
OX-0021	O=C(N[C@@H](Cc1ccccc1)C(=O)O)OCc1ccccc1	1	21	RS	RS	RS	RS	RS	RS	RS	RS	RS	RS	TS	RS	RS	RS	RS	RS	KS	PS	CT	CT	CT	CT	CT	CT	CT	CT	CT	CT	CT	CT	CT	CT	FI	CT	CT	DR	99
OX-0022	NCC(NC(=O)OCc1ccccc1)C(=O)O	1	22	PS	PS	PS	PS	PS	PS	PS	PS	PS	PS	PS	PS	PS	PS	PS	PS	PS	PS	DR	DR	YX	YX	YX	CT	CT	YX	YX	YX	YX	YX	DR	YX	YX	YX	YX	YX	99
OX-0023	O=C(NC(O)C(=O)O)OCc1ccccc1	1	23	RS	KS	TS	RS	RS	TS	RS	TS	PS	PS	PS	RS	TS	RS	RS	PS	PS	PS	YX	YX	XX	CT	CT	XX	XX	CT	DR	YX	DR	CT	YX	XX	CT	CT	CT	DR	99
OX-0024	O=C(N[C@@H](Cc1ccccc1)C(=O)Oc1ccc([N+](=O)[O-])cc1)OCc1ccccc1	1	24	TS	TS	RS	RS	RS	RS	RS	RS	RS	RS	KS	RS	RS	RS	RS	RS	TS	PS	XX	YX	CT	CT	FI	YX	CT	XX	XX	CT	XX	CT	XX	CT	CT	CT	XX	XX	52
OX-0025	O=C(O)CC[C@H](NC(=O)OCc1ccccc1)C(=O)O	1	25	RS	RS	TS	RS	RS	TS	TS	TS	PS	PS	PS	RS	RS	RS	RS	PS	TS	PS	FI	FI	CT	CT	FI	CT	CT	CT	YX	CT	YX	CT	AM	CT	FI	YX	CT	YX	99
OX-0026	O=C(O)CNC(=O)C(Cc1ccccc1)NC(=O)OCc1ccccc1	1	26	RS	TS	RS	RS	RS	TS	TS	PS	PS	PS	PS	RS	RS	TS	RS	PS	PS	PS	CT	CT	CT	CT	CT	CT	CT	CT	CT	CT	CT	DR	CT	CT	CT	CT	DR	DR	99
OX-0027	O=C(NC(C(=O)O)c1ccccc1)OCc1ccccc1	1	27	RS	RS	TS	RS	RS	RS	RS	PS	TS	RS	PS	RS	RS	TS	RS	RS	TS	PS	XX	CT	XX	CT	FI	CT	CT	XX	XX	XX	XX	CT	CT	CT	XX	XX	XX	YX	99
OX-0028	O=C(N[C@H](Cc1c[nH]c2ccccc12)C(=O)O)OCc1ccccc1	1	28	RS	RS	RS	RS	RS	RS	RS	RS	PS	TS	PS	RS	RS	RS	RS	RS	RS	PS	XX	CT	CT	CT	FI	XX	XX	CT	XX	XX	YX	CT	FI	CT	FI	CT	YX	DR	99
OX-0029	NC(=O)CC[C@H](NC(=O)OCc1ccccc1)C(=O)O	1	29	RS	RS	PS	RS	RS	PS	PS	PS	PS	PS	PS	TS	TS	TS	RS	PS	PS	PS	AM	CT	DR	CT	CT	DR	DR	DR	DR	DR	DR	CT	CT	DR	FI	DR	DR	DR	99
OX-0030	C[C@H](NC(=O)[C@H](Cc1ccccc1)NC(=O)OCc1ccccc1)C(=O)CF	1	30	TS	RS	RS	RS	RS	RS	RS	PS	PS	RS	TS	RS	TS	RS	RS	RS	PS	PS	CT	YX	CT	CT	CT	YX	YX	YX	XX	YX	XX	CT	YX	CT	FI	CT	YX	YX	99
OX-0031	CC(=O)[C@H](C)NC(=O)[C@H](Cc1ccccc1)NC(=O)OCc1ccccc1	1	31	KS	TS	RS	RS	RS	TS	RS	PS	TS	RS	TS	RS	TS	RS	RS	RS	PS	PS	YX	XX	CT	CT	XX	XX	XX	YX	CT	CT	YX	YX	XX	XX	XX	XX	YX	YX	99
OX-0032	COC(CN[C@@H](c1ccccc1)[C@@H](NS(=O)(=O)c1ccccc1)C(=O)NC1CCCCC1)OC	1	32	RS	RS	RS	RS	RS	RS	RS	RS	RS	RS	RS	RS	RS	RS	RS	RS	RS	TS	AM	AM	AM	AM	AM	CT	CT	FI	CT	AM	CT	AM	FI	FI	FI	CT	CT	XX	99
OX-0033	O=C(N[C@@H](CO)Cc1ccccc1)OCc1ccccc1	1	33	RS	RS	RS	TS	KS	KS	KS	KS	KS	RS	TS	RS	RS	RS	RS	RS	RS	TS	YX	CT	YX	CT	CT	CT	YX	YX	CT	XX	CT	CT	CT	CT	YX	CT	YX	YX	99
OX-0034	O=C(N[C@@H](Cc1ccc(O)cc1)C(=O)O)OCc1ccccc1	1	34	RS	RS	RS	RS	RS	RS	RS	RS	PS	TS	PS	RS	RS	RS	RS	RS	RS	PS	FI	FI	FI	CT	FI	FI	FI	FI	YX	CT	YX	CT	FI	FI	FI	FI	FI	DR	99
OX-0035	C[C@@H](NC(=O)OCc1ccccc1)C(=O)O	1	35	RS	RS	RS	RS	RS	RS	RS	RS	TS	RS	TS	RS	RS	RS	RS	RS	RS	PS	CT	CT	CT	CT	FI	CT	CT	CT	CT	CT	XX	CT	FI	CT	FI	XX	XX	YX	99
OX-0036	O=C(N[C@@H](Cc1ccccc1)C(=O)N[C@@H](Cc1ccccc1)C(=O)O)OCc1ccccc1	1	36	KS	TS	PS	RS	RS	PS	TS	PS	PS	TS	PS	RS	TS	KS	RS	TS	PS	PS	CT	CT	DR	CT	FI	CT	CT	AM	CT	CT	CT	CT	YX	CT	CT	DR	CT	DR	99
OX-0037	NC(=O)CCC(NC(=O)OCc1ccccc1)C(=O)O	1	37	RS	KS	PS	RS	RS	PS	PS	PS	PS	PS	PS	KS	TS	KS	RS	PS	PS	PS	CT	CT	CT	CT	CT	CT	CT	DR	DR	DR	DR	XX	CT	DR	FI	DR	DR	DR	99
OX-0038	CC(=O)N[C@H](Cc1ccccc1)C(=O)O	1	38	RS	RS	PS	RS	RS	PS	PS	PS	PS	PS	PS	RS	RS	RS	RS	PS	PS	PS	CT	CT	XX	XX	CT	XX	XX	XX	XX	XX	XX	XX	CT	XX	CT	XX	XX	YX	99
OX-0039	C[C@H](NC(=O)OCc1ccccc1)C(=O)O	1	39	RS	KS	TS	KS	RS	TS	TS	PS	PS	RS	PS	TS	RS	KS	RS	RS	PS	PS	CT	CT	XX	CT	FI	XX	XX	YX	YX	XX	YX	XX	CT	XX	XX	CT	YX	YX	0
OX-0040	O=C(N[C@H](Cc1ccccc1)C(=O)N1CCC[C@H]1C(=O)O)OCc1ccccc1	1	40	RS	RS	TS	RS	RS	TS	TS	PS	PS	RS	PS	RS	RS	RS	RS	RS	PS	PS	AM	AM	AM	AM	AM	AM	CT	AM	XX	CT	FI	FI	FI	FI	FI	AM	XX	YX	99
OX-0041	O=C(O)CCC(NC(=O)OCc1ccccc1)C(=O)O	1	41	RS	RS	TS	PS	PS	KS	RS	RS	RS	PS	PS	RS	RS	RS	RS	PS	KS	PS	CT	FI	FI	CT	DR	CT	FI	CT	FI	DR	DR	FI	FI	FI	FI	CT	CT	DR	99
OX-0042	CC(C)[C@H](NC(=O)OCc1ccccc1)C(=O)O	1	42	RS	RS	RS	RS	RS	RS	RS	RS	RS	RS	RS	RS	RS	RS	RS	RS	RS	KS	FI	FI	FI	FI	FI	FI	FI	FI	FI	FI	FI	FI	FI	XX	FI	FI	XX	XX	99
OX-0043	O=C(N[C@H](CO)Cc1ccccc1)OCc1ccccc1	1	43	RS	RS	RS	RS	RS	RS	RS	TS	RS	RS	TS	RS	RS	RS	RS	RS	KS	PS	CT	CT	YX	YX	XX	XX	XX	XX	YX	YX	XX	XX	XX	YX	FI	CT	YX	YX	99
OX-0044	CC(C)(C)OC(=O)NC(Cc1ccccc1)C(=O)O	1	44	RS	TS	RS	RS	PS	TS	TS	RS	RS	TS	PS	TS	RS	RS	RS	TS	TS	PS	CT	CT	XX	CT	YX	DR	DR	DR	CT	CT	YX	XX	YX	CT	AM	CT	CT	YX	99
OX-0045	O=C(N[C@@H](Cc1ccccc1)C(=O)O)OCC1c2ccccc2-c2ccccc21	1	45	TS	TS	PS	RS	PS	TS	RS	TS	RS	PS	PS	TS	TS	RS	RS	TS	TS	PS	CT	CT	CT	CT	XX	XX	CT	FI	FI	CT	XX	CT	DR	YX	DR	CT	DR	YX	99
OX-0046	CON(C)C(=O)[C@H](Cc1ccccc1)NC(=O)OCc1ccccc1	1	46	NA	NA	NA	NA	NA	NA	NA	NA	NA	NA	NA	NA	NA	NA	NA	NA	NA	NA	NA	NA	NA	NA	NA	NA	NA	NA	NA	NA	NA	NA	NA	NA	NA	NA	NA	NA	NA
OX-0047	NC(=O)NC(Cc1ccccc1)C(=O)O	1	47	NA	NA	NA	NA	NA	NA	NA	NA	NA	NA	NA	NA	NA	NA	NA	NA	NA	NA	NA	NA	NA	NA	NA	NA	NA	NA	NA	NA	NA	NA	NA	NA	NA	NA	NA	NA	NA
OX-0048	CNC(=O)Nc1ccc(Cl)c(Cl)c1	2	1	RS	RS	KS	RS	PS	RS	KS	RS	RS	PS	PS	RS	KS	RS	RS	TS	PS	PS	YX	YX	XX	YX	YX	XX	XX	CT	CT	YX	YX	YX	XX	XX	XX	XX	XX	XX	99
OX-0049	O=C(Nc1cccc(Cl)c1)Nc1ccc(Cl)c(Cl)c1	2	2	TS	KS	PS	RS	PS	RS	RS	TS	RS	PS	PS	PS	KS	RS	RS	PS	PS	PS	XX	YX	YX	XX	YX	XX	YX	XX	CT	YX	YX	XX	XX	YX	YX	YX	XX	DR	99
OX-0050	CC(C)OC(=O)Nc1ccc(Cl)c(Cl)c1	2	3	RS	RS	RS	RS	KS	RS	RS	RS	RS	KS	KS	RS	RS	RS	RS	RS	RS	TS	XX	YX	XX	XX	XX	XX	XX	YX	XX	XX	XX	XX	XX	YX	XX	XX	XX	XX	99
OX-0051	CCOC(=O)Nc1ccc(Cl)c(Cl)c1	2	4	RS	RS	RS	RS	RS	RS	RS	RS	RS	RS	RS	RS	RS	RS	RS	RS	RS	TS	CT	XX	XX	XX	CT	CT	XX	XX	YX	YX	YX	YX	XX	AM	AM	XX	XX	XX	99
OX-0052	O=C(Nc1ccc(Cl)c(Cl)c1)Nc1cc(Cl)c(Cl)c(Cl)c1	2	5	PS	PS	PS	KS	PS	KS	KS	PS	RS	PS	PS	PS	TS	RS	RS	PS	PS	PS	YX	YX	YX	YX	YX	YX	YX	CT	YX	YX	YX	YX	YX	YX	YX	YX	YX	YX	79
OX-0053	S=C(Nc1ccc(Cl)c(Cl)c1)Nc1ccc(Cl)c(Cl)c1	2	6	KS	RS	RS	RS	RS	RS	RS	RS	RS	RS	RS	TS	RS	RS	RS	RS	RS	PS	XX	XX	XX	CT	XX	CT	CT	XX	YX	YX	YX	XX	XX	AM	AM	XX	XX	YX	99
OX-0054	CC(C)CC(=O)Nc1ccc(Cl)c(Cl)c1	2	7	RS	RS	RS	RS	RS	RS	RS	RS	RS	RS	RS	RS	RS	RS	RS	RS	RS	TS	FI	FI	XX	FI	CT	FI	CT	CT	AM	CT	CT	CT	CT	AM	AM	XX	XX	XX	99
OX-0055	Cc1ccc(S(=O)(=O)NC(=O)Nc2ccc(Cl)c(Cl)c2)cc1	2	8	PS	PS	PS	RS	PS	KS	TS	PS	RS	PS	PS	PS	TS	KS	RS	PS	PS	PS	YX	YX	YX	YX	YX	CT	YX	YX	YX	YX	YX	YX	YX	YX	CT	YX	YX	YX	0
OX-0056	NS(=O)(=O)c1ccc(NC(=O)Nc2ccc(Cl)c(Cl)c2)cc1	2	9	PS	PS	PS	TS	PS	PS	PS	PS	RS	PS	PS	PS	TS	TS	RS	PS	PS	PS	YX	YX	YX	YX	YX	YX	YX	YX	YX	YX	YX	YX	YX	XX	XX	CT	YX	YX	99
OX-0057	O=C(Nc1cc(C(F)(F)F)cc(C(F)(F)F)c1)Nc1ccc(Cl)c(Cl)c1	2	10	KS	RS	RS	RS	PS	RS	RS	RS	RS	PS	PS	RS	RS	KS	RS	TS	RS	PS	XX	XX	YX	XX	XX	XX	XX	XX	XX	YX	YX	YX	YX	YX	YX	YX	XX	YX	99
OX-0058	O=C(Nc1ccc(Cl)c(Cl)c1)Nc1cc(Cl)ccc1Cl	2	11	PS	PS	PS	PS	PS	PS	PS	PS	TS	PS	PS	PS	PS	TS	TS	PS	PS	PS	DR	DR	DR	YX	DR	YX	YX	YX	XX	YX	DR	YX	YX	YX	YX	DR	YX	YX	99
OX-0059	COC(=O)Nc1ccc(Cl)c(Cl)c1	2	12	RS	RS	RS	RS	RS	RS	RS	RS	RS	RS	RS	RS	RS	RS	RS	RS	RS	TS	XX	XX	XX	XX	XX	XX	XX	YX	YX	XX	XX	XX	YX	YX	YX	CT	XX	XX	99
OX-0060	CC(C)C(=O)Nc1ccc(Cl)c(Cl)c1	2	13	RS	RS	RS	RS	TS	RS	RS	RS	RS	RS	TS	RS	RS	RS	RS	RS	RS	TS	XX	XX	XX	XX	XX	XX	XX	XX	XX	XX	XX	XX	XX	XX	XX	XX	XX	XX	99
OX-0061	Cc1c(Cl)cccc1NC(=O)Nc1ccc(Cl)c(Cl)c1	2	14	PS	PS	PS	TS	PS	PS	PS	PS	RS	PS	PS	PS	TS	KS	KS	PS	PS	PS	YX	YX	YX	YX	YX	YX	YX	YX	YX	YX	YX	YX	YX	YX	YX	YX	YX	CT	99
OX-0062	CN(C)c1ccc(NC(=O)Nc2ccc(Cl)c(Cl)c2)cc1	2	15	PS	PS	PS	PS	PS	PS	PS	PS	RS	PS	PS	PS	TS	TS	RS	RS	PS	PS	XX	XX	XX	XX	XX	XX	XX	XX	CT	XX	XX	XX	XX	XX	XX	XX	XX	XX	99
OX-0063	CN(C)C(=O)Nc1ccc(Cl)c(Cl)c1	2	16	RS	RS	PS	RS	PS	KS	RS	PS	RS	RS	PS	KS	KS	RS	RS	RS	PS	TS	XX	YX	XX	XX	XX	XX	CT	XX	YX	XX	XX	XX	CT	XX	XX	XX	XX	XX	99
OX-0064	O=C(Nc1ccc(Cl)c(Cl)c1)Nc1ccccc1Cl	2	17	PS	RS	PS	RS	PS	RS	RS	PS	RS	PS	PS	PS	TS	RS	RS	PS	TS	PS	CT	YX	CT	CT	YX	YX	XX	YX	DR	DR	DR	YX	YX	CT	CT	DR	CT	DR	99
OX-0065	CC(C)(C)NC(=O)Nc1ccc(Cl)c(Cl)c1	2	18	RS	RS	TS	RS	RS	RS	RS	RS	RS	PS	PS	RS	KS	RS	RS	TS	KS	PS	XX	XX	YX	YX	YX	YX	YX	YX	YX	YX	YX	YX	YX	YX	YX	YX	YX	DR	99
OX-0066	O=C(Nc1ccc(Cl)cc1)Nc1ccc(Cl)c(Cl)c1	2	19	TS	TS	PS	RS	RS	RS	KS	PS	RS	PS	PS	PS	KS	RS	RS	PS	PS	PS	XX	XX	XX	XX	XX	YX	XX	YX	XX	DR	DR	XX	XX	XX	XX	YX	YX	DR	99
OX-0067	CC(C)(CO)NC(=O)Nc1ccc(Cl)c(Cl)c1	2	20	RS	KS	PS	RS	RS	RS	RS	PS	RS	PS	PS	PS	KS	RS	RS	PS	RS	PS	XX	XX	XX	XX	YX	XX	XX	XX	YX	YX	YX	XX	XX	XX	XX	XX	XX	YX	99
OX-0068	CN(C)CCNC(=O)Nc1ccc(Cl)c(Cl)c1	2	21	TS	RS	TS	RS	RS	RS	RS	KS	RS	RS	PS	PS	KS	RS	RS	RS	KS	PS	CT	CT	XX	XX	YX	CT	CT	XX	YX	CT	YX	CT	CT	FI	FI	XX	XX	YX	99
OX-0069	C=C(C)C(=O)Nc1ccc(Cl)c(Cl)c1	2	22	RS	RS	RS	RS	RS	RS	RS	RS	RS	RS	RS	KS	KS	RS	RS	RS	RS	PS	XX	XX	YX	CT	DR	XX	XX	CT	DR	XX	XX	XX	XX	XX	XX	XX	XX	XX	99
OX-0070	Cc1cc(NC(=O)Nc2ccc(Cl)c(Cl)c2)no1	2	23	PS	PS	PS	TS	RS	TS	TS	PS	RS	PS	PS	PS	TS	KS	RS	PS	PS	PS	XX	XX	XX	XX	XX	XX	XX	XX	YX	YX	YX	XX	XX	XX	XX	XX	XX	YX	99
OX-0071	O=C(Nc1ccc(Cl)c(Cl)c1)NS(=O)(=O)c1ccc(Cl)cc1	2	24	TS	PS	PS	RS	RS	KS	RS	PS	RS	PS	PS	RS	TS	RS	RS	PS	TS	PS	XX	XX	XX	XX	YX	XX	XX	YX	YX	YX	YX	XX	XX	XX	FI	YX	YX	YX	99
OX-0072	CCCC(=O)Nc1ccc(Cl)c(Cl)c1	2	25	RS	RS	RS	RS	RS	RS	RS	RS	RS	RS	RS	RS	RS	RS	RS	RS	RS	TS	XX	XX	YX	YX	FI	XX	XX	XX	XX	XX	XX	XX	XX	XX	AM	XX	XX	XX	99
OX-0073	CN(C)NC(=O)Nc1ccc(Cl)c(Cl)c1	2	26	RS	RS	RS	RS	RS	RS	RS	TS	RS	RS	TS	RS	KS	RS	RS	RS	RS	PS	CT	CT	YX	XX	YX	XX	YX	XX	XX	XX	YX	CT	CT	CT	AM	XX	XX	XX	99
OX-0074	CCOc1cccc(-n2cc(-c3ccccc3)c3c(N)ncnc32)c1	3	1	TS	PS	RS	RS	RS	TS	RS	PS	RS	RS	TS	TS	NA	NA	NA	NA	NA	NA	XX	XX	XX	XX	AM	CT	CT	XX	XX	CT	XX	XX	NA	NA	NA	NA	NA	NA	99
OX-0075	COc1cccc(-c2cn(-c3cccc(OCCNCCO)c3)c3ncnc(N)c23)c1	3	2	RS	TS	PS	TS	RS	PS	PS	PS	RS	RS	PS	PS	KS	RS	RS	RS	PS	PS	FI	XX	XX	AM	FI	AM	YX	YX	FI	AM	YX	XX	XX	AM	AM	XX	YX	YX	99
OX-0076	Nc1ncnc2c1c(-c1cccc(O)c1)cn2-c1cccc(OCCNCCO)c1	3	3	PS	PS	PS	PS	RS	PS	PS	PS	RS	PS	PS	PS	TS	PS	PS	PS	PS	PS	CT	YX	DR	DR	FI	DR	DR	YX	FI	YX	YX	CT	CT	CT	AM	CT	DR	DR	99
OX-0077	Nc1ncnc2c1c(-c1ccccc1)cn2-c1ccc2c(c1)OCO2	3	4	TS	PS	TS	RS	RS	TS	RS	PS	RS	RS	PS	KS	TS	RS	RS	RS	PS	PS	XX	XX	XX	YX	CT	YX	XX	XX	CT	XX	XX	XX	XX	AM	CT	XX	XX	DR	99
OX-0078	COc1cccc(-c2cn(-c3cccc(CO)c3)c3ncnc(N)c23)c1	3	5	TS	PS	PS	TS	RS	PS	PS	PS	RS	TS	PS	PS	NA	NA	NA	NA	NA	NA	XX	CT	YX	FI	CT	XX	XX	YX	CT	DR	DR	DR	NA	NA	NA	NA	NA	NA	0
OX-0079	COc1cccc(-c2cn(-c3ccccc3)c3ncnc(N)c23)c1	3	6	PS	PS	PS	TS	RS	PS	TS	PS	RS	RS	PS	TS	TS	RS	RS	RS	PS	PS	XX	YX	XX	XX	XX	XX	XX	XX	XX	CT	XX	XX	XX	XX	AM	XX	XX	YX	99
OX-0080	Nc1ncnc2c1c(-c1cccc(O)c1)cn2-c1cccc(OCCCNCCO)c1	3	7	TS	PS	PS	PS	RS	PS	PS	PS	RS	PS	PS	PS	TS	TS	TS	PS	PS	PS	AM	CT	CT	CT	FI	AM	YX	YX	AM	DR	DR	DR	CT	AM	AM	DR	DR	DR	67
OX-0081	COc1cc(OC)cc(-n2cc(-c3ccccc3)c3c(N)ncnc32)c1	3	8	TS	RS	RS	RS	RS	RS	RS	RS	RS	RS	RS	RS	TS	RS	RS	RS	KS	PS	XX	XX	XX	XX	CT	FI	XX	XX	CT	DR	XX	XX	XX	XX	AM	XX	XX	DR	81
OX-0082	Nc1ncnc2c1c(-c1ccccc1)cn2-c1cccc(C(=O)NCCO)c1	3	9	PS	KS	PS	TS	RS	PS	PS	PS	RS	PS	PS	PS	TS	KS	RS	TS	PS	PS	AM	AM	YX	YX	YX	YX	YX	CT	FI	CT	DR	YX	CT	CT	CT	YX	YX	YX	99
OX-0083	Nc1ncnc2c1c(-c1ccc(O)cc1)cn2-c1cccc(OCCCn2ccnc2)c1	3	10	TS	KS	PS	PS	RS	PS	PS	PS	RS	PS	PS	PS	TS	TS	RS	PS	PS	PS	XX	XX	YX	YX	CT	CT	YX	YX	AM	YX	YX	CT	XX	XX	AM	XX	DR	DR	99
OX-0084	Nc1ncnc2c1c(-c1ccccc1)cn2-c1ccc(O)cc1	3	11	PS	PS	KS	TS	RS	PS	TS	PS	RS	PS	PS	PS	TS	KS	RS	PS	PS	PS	XX	FI	YX	XX	CT	XX	XX	YX	CT	YX	YX	XX	XX	XX	AM	YX	YX	DR	99
OX-0085	Nc1ncnc2c1c(-c1ccccc1)cn2-c1cccc(OCCNCCO)c1	3	12	PS	PS	PS	PS	PS	PS	PS	PS	PS	PS	PS	PS	PS	TS	TS	PS	PS	PS	YX	YX	YX	YX	YX	YX	YX	YX	YX	YX	YX	YX	XX	AM	AM	YX	YX	YX	99
OX-0086	Nc1ncnc2c1c(-c1ccccc1)cn2-c1ccc(CO)cc1	3	13	PS	PS	PS	PS	RS	PS	PS	PS	RS	PS	PS	PS	TS	TS	TS	PS	PS	PS	XX	XX	YX	XX	FI	XX	XX	YX	YX	XX	YX	YX	XX	XX	XX	XX	YX	YX	99
OX-0087	Nc1ncnc2c1c(-c1ccc(O)cc1)cn2-c1cccc(CO)c1	3	14	PS	PS	PS	PS	RS	PS	PS	PS	RS	PS	PS	PS	TS	TS	TS	PS	PS	PS	XX	XX	CT	YX	XX	YX	YX	YX	CT	YX	YX	YX	XX	YX	AM	XX	XX	XX	99
OX-0088	Nc1ncnc2c1c(-c1ccccc1)cn2-c1cccc(OCc2ccccc2)c1	3	15	PS	PS	PS	PS	RS	PS	PS	PS	RS	RS	PS	PS	TS	TS	RS	RS	PS	PS	XX	XX	XX	XX	CT	XX	XX	YX	FI	AM	YX	YX	XX	XX	AM	AM	YX	YX	99
OX-0089	Nc1ncnc2c1c(-c1ccc(F)cc1)cn2-c1ccccc1	3	16	PS	PS	PS	RS	RS	TS	RS	PS	RS	RS	TS	TS	TS	RS	RS	RS	PS	PS	XX	XX	XX	XX	XX	XX	XX	YX	XX	XX	YX	YX	XX	XX	XX	XX	XX	YX	99
OX-0090	Nc1ncnc2c1c(-c1ccc(O)cc1)cn2-c1cccc(O)c1	3	17	KS	KS	PS	RS	RS	PS	PS	PS	RS	PS	PS	PS	TS	RS	RS	PS	PS	PS	CT	CT	DR	XX	CT	XX	YX	DR	CT	DR	DR	YX	CT	XX	AM	DR	CT	DR	99
OX-0091	CCOc1cccc(-c2cn(-c3ccc(OCCNCCO)cc3)c3ncnc(N)c23)c1	3	18	RS	RS	PS	TS	RS	PS	PS	PS	RS	RS	PS	TS	TS	RS	PS	RS	PS	PS	DR	XX	YX	YX	CT	CT	XX	YX	AM	YX	YX	XX	XX	YX	AM	XX	YX	YX	99
OX-0092	COc1ccc(-c2cn(-c3cccc(OCCn4ccnc4)c3)c3ncnc(N)c23)cc1	3	19	PS	PS	PS	PS	RS	PS	PS	PS	RS	RS	PS	PS	TS	PS	RS	TS	PS	PS	DR	YX	YX	YX	XX	DR	YX	DR	XX	XX	YX	YX	XX	XX	AM	XX	XX	XX	99
OX-0093	Nc1ncnc2c1c(-c1ccccc1)cn2-c1cccc(O)c1	3	20	TS	PS	PS	RS	RS	TS	PS	PS	RS	PS	PS	PS	TS	KS	KS	PS	PS	PS	FI	XX	YX	XX	FI	FI	XX	YX	FI	YX	YX	YX	XX	CT	AM	YX	XX	YX	99
OX-0094	Nc1ncnc2c1c(-c1ccccc1)cn2-c1cccc(Cl)c1	3	21	PS	PS	PS	PS	RS	PS	TS	PS	RS	TS	PS	PS	TS	RS	KS	RS	PS	PS	YX	XX	XX	XX	XX	XX	XX	YX	XX	YX	XX	XX	XX	XX	AM	YX	YX	YX	99
OX-0095	Nc1ncnc2c1c(-c1ccccc1)cn2-c1ccc(OCc2ccccc2)cc1	3	22	PS	PS	PS	PS	TS	PS	PS	PS	RS	RS	PS	PS	NA	NA	NA	NA	NA	NA	CT	XX	YX	XX	XX	YX	XX	YX	XX	XX	XX	XX	NA	NA	NA	NA	NA	NA	99
OX-0096	Nc1ncnc2c1c(-c1ccc(O)cc1)cn2-c1cccc(OCCn2ccnc2)c1	3	23	PS	PS	PS	PS	RS	PS	PS	PS	RS	PS	PS	PS	NA	NA	NA	NA	NA	NA	XX	XX	DR	YX	FI	DR	DR	DR	FI	CT	DR	YX	NA	NA	NA	NA	NA	NA	99
OX-0097	Nc1ncnc2c1c(-c1cccc(O)c1)cn2-c1cccc(OCCn2ccnc2)c1	3	24	RS	PS	PS	PS	RS	PS	PS	PS	RS	PS	PS	PS	TS	PS	TS	PS	PS	PS	CT	YX	YX	CT	FI	YX	YX	YX	FI	YX	YX	CT	XX	XX	YX	YX	YX	DR	99
OX-0098	Nc1ncnc2c1c(-c1ccccc1)cn2-c1cccc(OCCO)c1	3	25	RS	KS	RS	TS	RS	KS	RS	PS	RS	RS	PS	RS	TS	RS	RS	RS	PS	PS	FI	FI	FI	FI	FI	FI	FI	DR	FI	AM	XX	FI	FI	XX	FI	AM	XX	DR	99
OX-0099	O=C(CSC1=NCCN1)c1ccccc1	4	1	TS	TS	PS	PS	KS	PS	PS	PS	RS	PS	PS	PS	TS	TS	TS	TS	PS	PS	CT	XX	XX	XX	FI	YX	CT	CT	FI	XX	YX	XX	XX	XX	XX	XX	YX	YX	99
OX-0100	O=C(CSC1=NCCN1)Nc1ccccc1	4	2	RS	RS	PS	PS	RS	PS	PS	PS	RS	PS	PS	PS	KS	PS	PS	TS	PS	PS	FI	FI	XX	CT	FI	YX	YX	DR	FI	CT	DR	XX	FI	XX	XX	XX	DR	YX	99
OX-0101	O=C(CSC1=NCCN1)c1cccc(Cl)c1	4	3	TS	PS	PS	PS	RS	PS	PS	PS	RS	PS	PS	PS	TS	TS	KS	PS	PS	PS	YX	XX	XX	XX	CT	XX	YX	YX	CT	YX	YX	XX	XX	XX	XX	XX	YX	YX	99
OX-0102	O=C(CSC1=NCCN1)c1ccc(Cl)cc1	4	4	RS	TS	PS	PS	RS	PS	PS	PS	RS	PS	PS	PS	TS	PS	PS	PS	PS	PS	CT	XX	YX	YX	YX	YX	YX	YX	YX	YX	YX	YX	CT	YX	CT	YX	YX	YX	99
OX-0103	O=C(CSC1=NCCN1)c1ccccc1Cl	4	5	RS	KS	PS	PS	RS	PS	PS	PS	RS	PS	PS	PS	TS	PS	PS	PS	PS	PS	CT	XX	CT	CT	CT	CT	YX	DR	CT	CT	DR	YX	XX	YX	CT	CT	DR	DR	99
OX-0104	O=C(CSC1=NCCN1)c1ccccc1O	4	6	RS	KS	PS	PS	RS	PS	PS	PS	RS	PS	PS	PS	RS	PS	PS	PS	PS	PS	XX	XX	YX	YX	XX	YX	YX	YX	XX	YX	YX	YX	XX	YX	YX	YX	YX	YX	99
OX-0105	O=C(CSC1=NCCN1)c1cc(Cl)ccc1Cl	4	7	KS	PS	PS	PS	KS	PS	PS	PS	TS	PS	PS	PS	TS	TS	TS	PS	PS	PS	CT	YX	YX	YX	CT	YX	YX	DR	CT	CT	DR	YX	XX	YX	XX	DR	DR	DR	99
OX-0106	Cc1ccc(C(=O)CSC2=NCCN2)cc1	4	8	RS	TS	PS	PS	RS	PS	PS	PS	KS	PS	PS	PS	TS	PS	TS	TS	PS	PS	XX	YX	YX	YX	YX	YX	YX	YX	YX	YX	YX	XX	XX	YX	YX	YX	YX	YX	99
OX-0107	O=C(CSC1=NCCN1)c1ccco1	4	9	RS	PS	PS	PS	RS	PS	PS	PS	TS	PS	PS	PS	PS	PS	TS	TS	PS	PS	XX	XX	XX	YX	XX	CT	CT	YX	XX	YX	YX	XX	YX	YX	YX	YX	DR	YX	99
OX-0108	O=C(CSC1=NCCN1)c1ccc([N+](=O)[O-])cc1	4	10	PS	PS	PS	PS	PS	PS	PS	PS	TS	PS	PS	PS	PS	PS	PS	PS	PS	PS	YX	YX	YX	YX	AM	DR	YX	CT	AM	YX	YX	CT	YX	YX	YX	YX	DR	YX	99
OX-0109	Cc1cccc(C(=O)CSC2=NCCN2)c1	4	11	RS	TS	PS	PS	RS	PS	PS	PS	RS	PS	PS	PS	PS	PS	PS	PS	PS	PS	FI	FI	XX	XX	YX	YX	YX	CT	YX	XX	CT	YX	CT	YX	CT	YX	YX	XX	99
OX-0110	CCOc1c2cnc3ccccc3c2nn1-c1ccc(OC)cc1	5	1	NA	NA	NA	NA	NA	NA	NA	NA	NA	NA	NA	NA	NA	NA	NA	NA	NA	NA	NA	NA	NA	NA	NA	NA	NA	NA	NA	NA	NA	NA	NA	NA	NA	NA	NA	NA	NA
OX-0111	COc1ccc(-n2nc3c(cnc4ccccc43)c2OCC2CCCC2)cc1	5	2	TS	PS	KS	RS	RS	RS	TS	PS	PS	RS	RS	TS	TS	RS	RS	RS	TS	TS	CT	CT	CT	CT	XX	XX	XX	XX	XX	CT	XX	CT	XX	XX	CT	CT	XX	YX	99
OX-0112	COc1ccc(-n2nc3c(cnc4ccccc43)c2OCC(C)C)cc1	5	3	TS	PS	TS	RS	RS	TS	RS	PS	RS	RS	RS	TS	TS	RS	RS	RS	TS	TS	YX	CT	CT	XX	XX	AM	CT	XX	XX	CT	XX	XX	CT	XX	XX	XX	XX	XX	99
OX-0113	COc1ccc(-n2nc3c(cnc4ccccc43)c2OCC2CC2)cc1	5	4	KS	PS	RS	RS	RS	RS	RS	TS	RS	RS	RS	RS	TS	RS	RS	RS	RS	PS	YX	DR	DR	XX	CT	DR	XX	YX	CT	DR	XX	XX	XX	CT	CT	CT	XX	XX	99
OX-0114	COc1ccc(-n2nc3c(cnc4ccccc43)c2OCc2ccc(C(F)(F)F)cc2)cc1	5	5	PS	PS	PS	TS	KS	PS	TS	PS	RS	RS	PS	PS	TS	KS	RS	RS	PS	PS	YX	YX	YX	XX	XX	YX	YX	YX	XX	YX	YX	YX	YX	XX	CT	YX	YX	CT	99
OX-0115	COc1ccc(-n2nc3c(cnc4ccccc43)c2OCc2cccc(C(F)(F)F)c2)cc1	5	6	TS	PS	TS	RS	RS	RS	RS	TS	RS	RS	RS	RS	TS	RS	RS	RS	TS	PS	CT	YX	YX	CT	CT	YX	CT	YX	YX	CT	XX	YX	XX	YX	YX	CT	XX	YX	99
OX-0116	Clc1ccc(-n2nc3c(cnc4ccccc43)c2OCC2CCCC2)cc1	5	7	PS	PS	PS	TS	KS	KS	KS	PS	RS	RS	RS	PS	TS	RS	RS	RS	TS	PS	XX	XX	XX	XX	XX	XX	XX	XX	XX	CT	XX	YX	XX	XX	YX	CT	YX	XX	99
OX-0117	COc1ccc(-n2nc3c(cnc4ccccc43)c2SCc2ccccc2)cc1	5	8	PS	PS	PS	TS	RS	TS	KS	PS	RS	RS	RS	PS	TS	KS	RS	RS	TS	PS	XX	XX	XX	XX	XX	XX	XX	XX	XX	XX	XX	XX	XX	XX	XX	XX	XX	XX	99
OX-0118	COc1ccc(CSc2c3cnc4ccccc4c3nn2-c2ccc(OC)cc2)cc1	5	9	PS	PS	KS	TS	RS	PS	TS	PS	RS	RS	RS	PS	PS	KS	RS	RS	PS	PS	XX	XX	CT	XX	XX	XX	XX	XX	XX	XX	XX	XX	XX	XX	XX	XX	XX	YX	99
OX-0119	Clc1ccc(-n2nc3c(cnc4ccccc43)c2OCC2CC2)cc1	5	10	PS	PS	PS	KS	RS	KS	KS	PS	RS	RS	TS	PS	TS	RS	RS	RS	PS	PS	XX	XX	XX	XX	CT	YX	YX	XX	XX	CT	XX	XX	XX	CT	CT	CT	XX	XX	99
OX-0120	COc1ccc(-n2nc3c(cnc4ccccc43)c2OCc2ccc(Cl)cc2)cc1	5	11	PS	PS	PS	PS	TS	PS	PS	PS	RS	RS	PS	PS	PS	KS	KS	RS	PS	PS	YX	YX	YX	YX	XX	YX	YX	CT	XX	YX	YX	CT	YX	YX	YX	YX	YX	YX	99
OX-0121	COc1cccc(-c2cn(C3CCC3)c3ncnc(N)c23)c1	6	1	PS	PS	PS	PS	RS	PS	PS	PS	RS	RS	PS	PS	TS	RS	KS	RS	PS	PS	XX	XX	XX	XX	XX	XX	XX	XX	CT	CT	XX	XX	XX	XX	XX	XX	XX	YX	99
OX-0122	Nc1ncnc2c1c(-c1ccccc1)cn2C1CCCCCC1	6	2	RS	RS	TS	RS	RS	RS	RS	TS	RS	RS	RS	TS	RS	RS	RS	RS	RS	TS	XX	XX	XX	XX	XX	FI	CT	CT	YX	CT	CT	XX	CT	XX	XX	CT	XX	XX	99
OX-0123	COc1cccc(-c2cn(C3CCC(O)CC3)c3ncnc(N)c23)c1	6	3	RS	TS	RS	RS	RS	RS	RS	PS	RS	PS	PS	PS	RS	RS	RS	RS	PS	PS	XX	XX	XX	XX	CT	XX	XX	YX	CT	YX	YX	XX	CT	XX	FI	XX	YX	YX	99
OX-0124	COCCN1CCC(n2cc(-c3cccc(O)c3)c3c(N)ncnc32)CC1	6	4	RS	PS	PS	PS	RS	PS	PS	PS	RS	RS	PS	PS	KS	RS	RS	KS	PS	PS	AM	CT	YX	YX	XX	YX	YX	YX	XX	CT	YX	YX	AM	XX	AM	YX	YX	YX	99
OX-0125	CN1CCN([C@H]2CC[C@H](n3cc(-c4cccc(OCc5ccccc5)c4)c4c(N)ncnc43)CC2)CC1	6	5	KS	PS	PS	PS	TS	PS	PS	PS	KS	RS	PS	PS	TS	KS	RS	RS	PS	PS	AM	CT	YX	XX	XX	XX	YX	YX	XX	AM	XX	YX	XX	XX	AM	XX	YX	YX	99
OX-0126	Nc1ncnc2c1c(-c1ccccc1)cn2C1CCCC1	6	6	RS	RS	RS	RS	RS	RS	RS	TS	RS	RS	RS	RS	RS	RS	RS	RS	RS	TS	FI	FI	XX	CT	CT	AM	FI	CT	CT	AM	FI	FI	FI	FI	FI	CT	CT	XX	99
OX-0127	COc1cccc(-c2cn(C(C)C)c3ncnc(N)c23)c1	6	7	PS	PS	TS	RS	RS	TS	TS	PS	RS	PS	PS	TS	TS	RS	RS	RS	PS	PS	XX	XX	YX	YX	XX	XX	XX	XX	YX	YX	XX	YX	XX	XX	XX	XX	XX	YX	99
OX-0128	COc1cccc(-c2cn(C3CCN(CC(N)=O)CC3)c3ncnc(N)c23)c1	6	8	PS	PS	PS	PS	TS	PS	PS	PS	RS	RS	PS	PS	TS	KS	TS	RS	PS	PS	XX	XX	XX	XX	XX	XX	YX	YX	XX	XX	YX	XX	XX	XX	XX	XX	YX	YX	99
OX-0129	COC(=O)CN1CCC(n2cc(-c3cccc(OC)c3)c3c(N)ncnc32)CC1	6	9	PS	PS	PS	PS	TS	PS	PS	PS	RS	RS	PS	PS	TS	TS	KS	RS	PS	PS	YX	YX	YX	YX	XX	YX	YX	YX	XX	CT	CT	YX	YX	XX	XX	YX	DR	DR	99
OX-0130	COc1cccc(-c2cn(C3CCN(C(=O)OC(C)(C)C)C3)c3ncnc(N)c23)c1	6	10	PS	PS	TS	TS	KS	PS	PS	PS	RS	RS	PS	PS	TS	KS	KS	RS	PS	PS	CT	DR	DR	CT	CT	DR	CT	DR	CT	DR	CT	CT	CT	CT	CT	CT	DR	DR	99
OX-0131	CCOC(=O)c1cnc2cc(OCC3CC3)c(OCC3CC3)cc2c1O	7	1	PS	PS	PS	PS	PS	PS	PS	PS	PS	PS	PS	PS	PS	PS	PS	PS	PS	PS	DR	DR	DR	DR	CT	YX	DR	DR	CT	DR	CT	CT	CT	DR	CT	CT	YX	DR	99
OX-0132	CCOC(=O)c1cnc2cc(OCC(C)C)c(OCC(C)C)cc2c1O	7	2	PS	PS	PS	PS	PS	PS	PS	PS	PS	PS	PS	PS	PS	PS	PS	PS	PS	PS	YX	YX	YX	YX	XX	YX	YX	YX	XX	YX	YX	XX	YX	YX	YX	YX	YX	YX	99
OX-0133	CCCc1cc2c(O)c(C(=O)OCC)cnc2cc1OCC1CC1	7	3	PS	PS	PS	PS	PS	PS	PS	PS	PS	PS	PS	PS	PS	PS	PS	PS	PS	PS	YX	YX	YX	YX	YX	YX	YX	YX	YX	YX	YX	YX	YX	YX	YX	YX	YX	YX	99
OX-0134	CCOC(=O)c1cnc2c(C)cc(OCC3CC3)cc2c1O	7	4	PS	PS	PS	PS	PS	PS	PS	PS	PS	PS	PS	PS	PS	PS	PS	PS	PS	PS	YX	YX	YX	YX	XX	YX	YX	YX	XX	XX	XX	YX	YX	YX	YX	XX	YX	XX	99
OX-0135	CCOC(=O)c1cnc2cc(Cl)c(OCC3CC3)cc2c1O	7	5	PS	PS	PS	PS	PS	PS	PS	PS	PS	PS	PS	PS	PS	PS	PS	PS	PS	PS	CT	CT	DR	YX	CT	YX	CT	CT	CT	CT	CT	CT	CT	CT	AM	YX	YX	YX	99
OX-0136	COC(=O)c1cnc2cc(OCC3CC3)c(OCC3CC3)cc2c1O	7	6	PS	PS	PS	PS	PS	PS	PS	PS	PS	PS	PS	PS	PS	PS	PS	PS	PS	PS	YX	YX	YX	YX	CT	YX	YX	CT	CT	YX	YX	YX	YX	YX	YX	YX	YX	DR	0
OX-0137	COC(=O)c1cnc2cc(NC(C)=O)c(OCC3CC3)cc2c1O	7	7	PS	PS	PS	PS	PS	PS	PS	PS	PS	PS	PS	PS	PS	PS	PS	PS	PS	PS	YX	YX	YX	YX	CT	YX	YX	YX	CT	YX	YX	YX	YX	YX	YX	YX	YX	YX	99
OX-0138	CCCCc1cc2ncc(C(=O)OC)c(O)c2cc1OCC1CC1	7	8	PS	PS	PS	PS	PS	PS	PS	PS	PS	PS	PS	PS	PS	PS	PS	PS	PS	PS	YX	XX	YX	XX	CT	CT	XX	XX	CT	CT	XX	XX	YX	CT	CT	DR	CT	DR	0
OX-0139	CCOC(=O)c1cnc2cc(OCCC(C)C)c(OCC3CC3)cc2c1O	7	9	PS	PS	PS	PS	PS	PS	PS	PS	PS	PS	PS	PS	PS	PS	PS	PS	PS	PS	YX	CT	YX	FI	CT	DR	DR	DR	CT	DR	DR	DR	CT	CT	CT	CT	DR	DR	64
OX-0140	CCCCc1cc2ncc(C(=O)OCC)c(O)c2cc1OCC1CC1	7	10	PS	PS	PS	PS	PS	PS	PS	PS	PS	PS	PS	PS	PS	PS	PS	PS	PS	PS	YX	YX	YX	YX	DR	YX	YX	YX	DR	YX	YX	YX	YX	YX	YX	CT	DR	DR	99
OX-0141	CCOC(=O)c1cnc2cc(OCC3CC3)ccc2c1O	7	11	PS	PS	PS	PS	PS	PS	PS	PS	PS	PS	PS	PS	PS	PS	PS	PS	PS	PS	YX	YX	XX	YX	YX	YX	YX	YX	YX	XX	YX	YX	YX	YX	YX	XX	YX	YX	99
OX-0142	CCCCCCCCOc1cc2ncc(C(=O)OCC)c(O)c2cc1OCC1CC1	7	12	PS	PS	PS	PS	PS	PS	PS	PS	PS	PS	PS	PS	PS	KS	RS	RS	RS	PS	YX	YX	XX	XX	YX	XX	XX	YX	CT	XX	XX	XX	XX	XX	XX	XX	XX	YX	0
OX-0143	CCCOc1cc2ncc(C(=O)OCC)c(O)c2cc1OCC1CC1	7	13	PS	PS	PS	PS	PS	PS	PS	PS	PS	PS	PS	PS	PS	PS	PS	PS	PS	PS	CT	XX	YX	DR	CT	DR	DR	DR	CT	YX	DR	DR	CT	AM	CT	DR	AM	DR	68
OX-0144	Cc1ccc(-c2nc(N3CCN(CCCC(=O)c4ccc(F)cc4)CC3)nc3ccccc23)cc1	8	1	TS	TS	TS	RS	RS	RS	RS	RS	RS	RS	RS	TS	TS	RS	RS	RS	RS	TS	FI	XX	AM	FI	AM	FI	FI	AM	AM	AM	AM	FI	XX	AM	AM	AM	XX	XX	99
OX-0145	Cc1nc(N2CCN(CCCC(=O)c3ccc(F)cc3)CC2)nc2ccccc12	8	2	PS	TS	RS	RS	RS	RS	RS	RS	RS	RS	RS	KS	PS	RS	RS	RS	KS	PS	XX	FI	CT	CT	YX	CT	CT	XX	CT	AM	AM	XX	FI	YX	YX	YX	XX	XX	99
OX-0146	O=C(CCCN1CCN(c2nc(-c3ccc(F)cc3)c3ccccc3n2)CC1)c1ccc(F)cc1	8	3	PS	TS	RS	RS	RS	RS	RS	RS	RS	RS	RS	TS	PS	RS	RS	RS	RS	TS	XX	XX	FI	FI	XX	AM	AM	XX	XX	AM	AM	XX	XX	AM	CT	AM	XX	XX	99
OX-0147	CC(C)c1nc(N2CCN(CCCC(=O)c3ccc(F)cc3)CC2)nc2ccccc12	8	4	PS	PS	TS	RS	RS	RS	RS	RS	RS	RS	RS	TS	PS	RS	RS	RS	RS	TS	XX	FI	CT	XX	CT	FI	XX	YX	CT	YX	YX	YX	FI	XX	XX	YX	XX	XX	99
OX-0148	O=C(CCCN1CCN(c2nc(-c3ccccc3)c3ccccc3n2)CC1)c1ccc(F)cc1	8	5	TS	TS	RS	RS	RS	RS	RS	RS	RS	RS	RS	TS	PS	RS	RS	RS	PS	PS	YX	YX	YX	YX	YX	YX	CT	CT	YX	CT	CT	YX	YX	AM	YX	AM	YX	YX	99
OX-0149	O=C(CCCN1CCN(c2nc(-c3ccccc3)c3cc(Cl)ccc3n2)CC1)c1ccc(F)cc1	8	6	PS	PS	PS	TS	TS	PS	PS	PS	PS	RS	PS	PS	PS	TS	RS	RS	PS	PS	DR	YX	CT	YX	YX	YX	CT	CT	YX	CT	CT	CT	YX	XX	YX	YX	YX	YX	99
OX-0150	O=C(CCCN1CCN(c2ncc3ccccc3n2)CC1)c1ccc(F)cc1	8	7	PS	PS	TS	RS	KS	KS	KS	PS	KS	RS	RS	TS	PS	TS	RS	RS	PS	PS	XX	XX	XX	XX	YX	XX	XX	XX	XX	YX	XX	XX	XX	XX	XX	XX	XX	XX	99
OX-0151	COc1ccc(-c2nc(N3CCN(CCCC(=O)c4ccc(F)cc4)CC3)nc3ccccc23)cc1	8	8	PS	PS	TS	RS	RS	RS	RS	PS	RS	RS	RS	TS	PS	RS	RS	RS	TS	PS	XX	XX	AM	CT	CT	AM	AM	AM	CT	AM	AM	AM	XX	AM	XX	AM	XX	XX	99
OX-0152	O=C(CCCN1CCN(c2nc(-c3ccc(Cl)cc3)c3ccccc3n2)CC1)c1ccc(F)cc1	8	9	PS	PS	TS	RS	RS	RS	RS	KS	RS	RS	RS	TS	RS	RS	RS	RS	KS	PS	YX	YX	CT	FI	CT	AM	AM	CT	CT	AM	AM	FI	AM	AM	AM	AM	CT	CT	99
OX-0153	Cc1ccc2c(-c3ccccc3)nc(N3CCN(CCCC(=O)c4ccc(F)cc4)CC3)nc2c1	8	10	PS	PS	TS	TS	TS	TS	TS	PS	TS	RS	RS	PS	PS	RS	RS	RS	PS	PS	XX	XX	XX	CT	CT	XX	XX	XX	YX	AM	AM	XX	YX	XX	XX	AM	XX	XX	99
OX-0154	O=C(CCCN1CCN(c2nc(C3CCCCC3)c3ccccc3n2)CC1)c1ccc(F)cc1	8	11	PS	PS	TS	TS	RS	RS	RS	RS	RS	RS	RS	PS	PS	RS	RS	RS	RS	TS	XX	AM	AM	CT	AM	AM	AM	AM	XX	CT	AM	FI	FI	AM	XX	AM	CT	XX	99
OX-0155	C#CCOc1ccc2c(c1)c(-c1ccc(C(C)C)cc1)nc(=O)n2Cc1ccc2nsnc2c1	9	1	PS	PS	RS	RS	RS	TS	RS	PS	RS	RS	TS	TS	PS	RS	RS	RS	PS	PS	DR	CT	DR	CT	DR	CT	CT	DR	DR	CT	DR	YX	YX	FI	DR	CT	DR	DR	99
OX-0156	C#CCOc1ccc2c(c1)c(-c1ccc(C(C)C)cc1)nc(=O)n2Cc1ccccc1OCC	9	2	RS	RS	RS	RS	RS	RS	RS	RS	RS	RS	RS	RS	KS	RS	RS	RS	RS	PS	FI	FI	FI	FI	AM	FI	AM	XX	CT	AM	AM	AM	AM	AM	AM	AM	XX	YX	99
OX-0157	C#CCOc1ccc2c(c1)c(-c1ccc(C(C)C)cc1)nc(=O)n2Cc1cccc(CC)c1	9	3	RS	RS	RS	RS	RS	RS	RS	TS	RS	RS	RS	RS	RS	RS	RS	RS	RS	PS	FI	FI	FI	FI	CT	FI	FI	AM	CT	AM	AM	AM	FI	FI	AM	AM	AM	YX	99
OX-0158	C#CCOc1ccc2c(c1)c(-c1ccc(C(C)C)cc1)nc(=O)n2Cc1ccc(OCC)c(OCC)c1	9	4	TS	TS	RS	RS	RS	RS	RS	PS	RS	RS	RS	RS	PS	RS	RS	RS	PS	PS	XX	AM	AM	AM	AM	AM	FI	XX	AM	AM	AM	AM	FI	FI	FI	AM	XX	YX	99
OX-0159	C#CCOc1ccc2c(c1)c(-c1ccc(C(C)C)cc1)nc(=O)n2Cc1ccccc1OC	9	5	TS	TS	TS	RS	RS	TS	TS	PS	RS	RS	TS	TS	PS	RS	RS	RS	PS	PS	CT	FI	XX	AM	XX	CT	YX	YX	XX	AM	YX	XX	XX	FI	CT	AM	YX	YX	99
OX-0160	C#CCOc1ccc2c(c1)c(-c1ccc(C(C)C)cc1)nc(=O)n2Cc1cccnc1Cl	9	6	PS	PS	TS	TS	RS	PS	PS	PS	RS	RS	PS	PS	PS	TS	KS	RS	PS	PS	YX	YX	XX	XX	YX	XX	XX	DR	YX	CT	DR	XX	YX	XX	CT	XX	CT	DR	99
OX-0161	C#CCOc1ccc2c(c1)c(-c1ccc(C(C)C)cc1)nc(=O)n2Cc1cccc(OC)c1	9	7	PS	PS	KS	KS	KS	PS	PS	PS	KS	RS	PS	KS	PS	RS	RS	RS	PS	PS	XX	XX	XX	FI	XX	CT	FI	YX	CT	AM	XX	AM	XX	AM	XX	AM	YX	DR	99
OX-0162	C#CCOc1ccc2c(c1)c(-c1ccc(C(C)C)cc1)nc(=O)n2Cc1cc(OCC)ccc1OCC	9	8	RS	RS	RS	RS	RS	RS	RS	RS	RS	RS	RS	RS	RS	RS	RS	RS	RS	PS	FI	FI	FI	FI	AM	AM	AM	AM	AM	AM	AM	AM	XX	AM	AM	AM	AM	YX	99
OX-0163	C#CCOc1ccc2c(c1)c(-c1ccc(C(C)C)cc1)nc(=O)n2Cc1ccc(OCC)cc1	9	9	PS	PS	PS	PS	TS	PS	PS	PS	PS	KS	PS	PS	PS	TS	TS	RS	PS	PS	DR	CT	DR	DR	XX	DR	DR	DR	CT	DR	DR	DR	DR	YX	DR	CT	DR	DR	99
OX-0164	C#CCOc1ccc2c(c1)c(-c1ccc(C(C)C)cc1)nc(=O)n2Cc1ccc(O)cc1	9	10	PS	PS	PS	PS	RS	PS	PS	PS	RS	PS	PS	PS	PS	TS	RS	TS	PS	PS	XX	XX	XX	XX	XX	XX	CT	YX	CT	YX	YX	XX	XX	XX	XX	XX	YX	YX	99
OX-0165	C#CCOc1ccc2c(c1)c(-c1ccc(C(C)C)cc1)nc(=S)n2Cc1cccc(OCCO)c1	9	11	TS	TS	TS	PS	KS	PS	PS	PS	RS	PS	PS	PS	PS	PS	RS	PS	PS	PS	FI	AM	AM	AM	AM	AM	AM	AM	AM	AM	AM	AM	CT	FI	FI	AM	AM	DR	80
OX-0166	O=C(N[C@H](CCC(=O)N1c2ccccc2C[C@H]1C(=O)O)C(=O)O)OCc1ccccc1	10	1	RS	TS	PS	KS	RS	PS	PS	PS	RS	PS	PS	PS	TS	KS	RS	PS	PS	PS	CT	CT	YX	CT	AM	YX	YX	YX	AM	YX	YX	XX	XX	XX	XX	YX	YX	YX	99
OX-0167	NC(=O)[C@@H]1Cc2ccccc2N1C(=O)CC[C@@H](NC(=O)OCc1ccccc1)C(=O)O	10	2	PS	PS	PS	PS	RS	PS	PS	PS	RS	PS	PS	PS	PS	PS	TS	PS	PS	PS	CT	CT	CT	CT	CT	DR	CT	DR	CT	DR	DR	YX	DR	CT	CT	DR	DR	DR	99
OX-0168	N[C@H](CCC(=O)N1c2ccccc2C[C@H]1C(=O)O)C(=O)O	10	3	PS	PS	PS	PS	PS	PS	PS	PS	PS	PS	PS	PS	PS	PS	PS	PS	PS	PS	XX	XX	XX	XX	XX	XX	XX	XX	XX	XX	XX	XX	XX	XX	XX	XX	XX	XX	99
OX-0169	O=C(O)C1Cc2ccccc2N1C(=O)CCS	10	4	PS	RS	PS	RS	RS	PS	PS	PS	RS	TS	PS	TS	KS	RS	RS	KS	PS	PS	YX	YX	CT	CT	XX	CT	CT	CT	AM	DR	CT	YX	CT	CT	CT	CT	CT	DR	99
OX-0170	CC(CCC(=O)N1c2ccccc2C[C@H]1C(=O)O)C(=O)O	10	5	RS	RS	PS	RS	RS	PS	TS	PS	RS	PS	PS	TS	KS	RS	RS	PS	PS	PS	XX	CT	CT	CT	AM	YX	CT	DR	AM	CT	DR	YX	CT	YX	CT	CT	DR	DR	99
OX-0171	O=C(Nc1ccccc1)N[C@H](CCC(=O)N1c2ccccc2C[C@H]1C(=O)O)C(=O)O	10	6	RS	TS	PS	PS	RS	PS	PS	PS	RS	PS	PS	PS	RS	KS	RS	PS	PS	PS	CT	CT	CT	XX	AM	CT	CT	DR	AM	DR	DR	YX	CT	YX	CT	DR	DR	DR	99
OX-0172	O=C(O)[C@@H]1Cc2ccccc2N1C(=O)CC[C@@H](NCc1ccccc1)C(=O)O	10	7	PS	PS	PS	PS	PS	PS	PS	PS	PS	PS	PS	PS	PS	PS	PS	PS	PS	PS	XX	XX	XX	XX	CT	XX	XX	XX	AM	XX	XX	XX	XX	XX	XX	XX	XX	XX	91
OX-0173	O=C(CCc1ccccc1)N[C@H](CCC(=O)N1c2ccccc2C[C@H]1C(=O)O)C(=O)O	10	8	TS	PS	PS	PS	RS	PS	PS	PS	RS	PS	PS	PS	PS	PS	TS	PS	PS	PS	XX	XX	DR	YX	CT	DR	YX	DR	CT	DR	DR	CT	YX	DR	YX	DR	DR	DR	99
OX-0174	O=C(O)[C@@H]1Cc2ccccc2N1C(=O)CCS	10	9	PS	RS	PS	RS	RS	PS	PS	PS	RS	PS	PS	RS	KS	RS	RS	PS	PS	PS	XX	CT	CT	CT	AM	YX	CT	DR	CT	YX	CT	XX	CT	CT	CT	CT	CT	DR	99
OX-0175	O=C(O)[C@H]1Cc2ccccc2N1C(=O)OCc1ccccc1	10	10	PS	PS	PS	PS	PS	PS	PS	PS	PS	PS	PS	PS	PS	PS	PS	PS	PS	PS	CT	DR	CT	CT	CT	CT	CT	CT	CT	CT	CT	DR	CT	CT	DR	DR	DR	DR	93
OX-0176	N#Cc1c(O)nc(SCc2cccc(F)c2F)nc1C1CC1	11	1	PS	PS	PS	PS	RS	PS	PS	PS	RS	PS	PS	PS	PS	KS	KS	PS	PS	PS	YX	YX	YX	YX	XX	XX	YX	YX	XX	YX	YX	YX	YX	YX	XX	YX	YX	YX	99
OX-0177	N#Cc1c(O)nc(SCc2cccc(F)c2F)nc1C1CCC1	11	2	KS	KS	TS	RS	RS	RS	RS	PS	RS	RS	TS	RS	TS	RS	RS	RS	KS	PS	YX	CT	DR	YX	AM	CT	DR	CT	CT	CT	DR	DR	CT	DR	DR	CT	DR	YX	99
OX-0178	Cc1nc(SCc2cccc(F)c2F)nc(O)c1C#N	11	3	RS	KS	PS	TS	RS	PS	PS	PS	RS	PS	PS	PS	PS	PS	RS	PS	PS	PS	CT	YX	XX	XX	CT	YX	YX	XX	CT	YX	YX	XX	CT	YX	CT	YX	YX	YX	99
OX-0179	N#Cc1c(O)nc(SCc2cccc(F)c2F)nc1-c1ccncc1	11	4	PS	PS	PS	PS	RS	PS	PS	PS	RS	PS	PS	PS	PS	PS	PS	PS	PS	PS	YX	YX	DR	YX	XX	YX	YX	DR	XX	DR	DR	YX	YX	YX	YX	DR	DR	DR	99
OX-0180	Cc1ccc(-c2nc(SCc3cccc(F)c3F)nc(O)c2C#N)cc1	11	5	PS	PS	PS	TS	RS	PS	PS	PS	RS	PS	PS	PS	PS	RS	RS	KS	PS	PS	XX	XX	XX	XX	CT	XX	XX	XX	CT	XX	XX	XX	YX	XX	XX	XX	XX	XX	99
OX-0181	N#Cc1c(O)nc(SCc2ccccc2)nc1C1CC1	11	6	PS	PS	PS	TS	RS	PS	PS	PS	RS	PS	PS	PS	PS	TS	RS	TS	PS	PS	XX	XX	YX	XX	XX	XX	XX	YX	XX	YX	YX	XX	XX	XX	XX	XX	XX	XX	99
OX-0182	N#Cc1c(O)nc(SCc2cccc(F)c2F)nc1-c1cccc(O)c1	11	7	KS	TS	PS	RS	RS	PS	PS	PS	RS	PS	PS	PS	TS	RS	RS	PS	PS	PS	CT	CT	CT	CT	AM	YX	DR	CT	CT	DR	DR	DR	YX	YX	CT	XX	CT	DR	99
OX-0183	N#Cc1c(O)nc(SCc2cccc(F)c2F)nc1-c1ccoc1	11	8	PS	PS	PS	PS	RS	PS	PS	PS	RS	PS	PS	PS	PS	PS	TS	PS	PS	PS	YX	YX	CT	YX	XX	YX	YX	YX	XX	YX	YX	YX	YX	YX	XX	YX	YX	YX	99
OX-0184	N#Cc1c(O)nc(SCc2cccc(F)c2F)nc1C(F)(F)F	11	9	RS	RS	TS	TS	RS	RS	RS	PS	RS	PS	PS	PS	RS	RS	RS	PS	PS	PS	CT	CT	YX	CT	CT	CT	CT	CT	CT	CT	CT	CT	CT	CT	CT	CT	CT	YX	99
OX-0185	N#Cc1c(O)nc(SCc2cccc(F)c2F)nc1-c1ccco1	11	10	PS	PS	PS	PS	RS	PS	PS	PS	RS	PS	PS	PS	PS	PS	TS	PS	PS	PS	CT	CT	CT	YX	XX	CT	YX	CT	XX	YX	YX	CT	CT	YX	XX	YX	YX	YX	99
OX-0186	CN(C)C(=O)Cc1cn(-c2cccc(C(F)(F)F)c2)nc1-c1ccc(Cl)cc1	12	1	KS	KS	RS	RS	RS	RS	RS	KS	RS	RS	RS	RS	RS	RS	RS	RS	RS	PS	FI	FI	XX	XX	AM	CT	CT	YX	AM	CT	YX	AM	FI	FI	CT	CT	XX	YX	99
OX-0187	Cc1ccc(-c2nn(-c3cccc(C(F)(F)F)c3)cc2CC(=O)N(C)C)cc1	12	2	RS	RS	RS	RS	RS	RS	RS	RS	RS	RS	RS	RS	KS	RS	RS	RS	RS	TS	XX	XX	XX	XX	AM	CT	CT	CT	AM	CT	CT	CT	YX	YX	XX	CT	XX	XX	99
OX-0188	O=C(Cc1cn(-c2cccc(C(F)(F)F)c2)nc1-c1ccc(Cl)c(Cl)c1)N1CCCC1	12	3	RS	RS	RS	RS	RS	RS	RS	RS	RS	RS	RS	RS	KS	RS	RS	RS	RS	PS	FI	FI	XX	YX	AM	AM	CT	XX	AM	CT	YX	CT	FI	YX	XX	XX	YX	YX	99
OX-0189	CN(C)C(=O)Cc1cn(-c2cccc(C(F)(F)F)c2)nc1-c1cccc2ccccc12	12	4	NA	NA	NA	NA	NA	NA	NA	NA	NA	NA	NA	NA	NA	NA	NA	NA	NA	NA	NA	NA	NA	NA	NA	NA	NA	NA	NA	NA	NA	NA	NA	NA	NA	NA	NA	NA	NA
OX-0190	CN(C)C(=O)Cc1cn(-c2cccc(C(F)(F)F)c2)nc1-c1ccc2sc3ccccc3c2c1	12	5	PS	PS	TS	TS	TS	PS	TS	PS	RS	RS	PS	PS	PS	KS	RS	RS	PS	PS	YX	YX	XX	CT	YX	CT	YX	YX	XX	CT	CT	CT	YX	YX	CT	YX	YX	YX	99
OX-0191	CN(C)C(=O)Cc1cn(-c2cccc(C(F)(F)F)c2)nc1-c1ccccc1	12	6	RS	RS	RS	RS	RS	RS	RS	TS	RS	RS	RS	RS	RS	KS	RS	RS	RS	TS	CT	XX	CT	AM	CT	CT	CT	CT	CT	CT	XX	CT	FI	CT	YX	CT	XX	XX	99
OX-0192	CN(C)C(=O)Cc1cn(-c2cccc(C(F)(F)F)c2)nc1-c1ccc2oc3ccccc3c2c1	12	7	PS	PS	RS	KS	RS	KS	TS	PS	RS	RS	PS	TS	TS	KS	RS	RS	PS	PS	YX	YX	XX	XX	YX	YX	YX	YX	YX	DR	YX	XX	XX	XX	YX	XX	YX	YX	99
OX-0193	CN(C)C(=O)Cc1cn(-c2cccc(C(F)(F)F)c2)nc1-c1ccc2c(c1)Cc1ccccc1O2	12	8	TS	TS	TS	KS	TS	TS	TS	PS	TS	RS	TS	TS	PS	RS	RS	RS	RS	PS	XX	XX	CT	XX	XX	XX	XX	YX	XX	XX	XX	XX	YX	XX	XX	XX	XX	DR	99
OX-0194	CN1CCN(C(=O)Cc2cn(-c3cccc(C(F)(F)F)c3)nc2-c2ccc(Cl)c(Cl)c2)CC1	12	9	RS	KS	RS	RS	RS	RS	RS	KS	RS	RS	RS	RS	RS	RS	RS	RS	RS	PS	XX	XX	XX	XX	AM	XX	XX	XX	CT	XX	XX	XX	XX	XX	AM	CT	XX	YX	99
OX-0195	CN(C)C(=O)Cc1cn(-c2cccc(C(F)(F)F)c2)nc1-c1ccc2c(c1)CCc1ccccc1-2	12	10	RS	RS	RS	RS	RS	RS	RS	TS	RS	RS	RS	RS	RS	RS	RS	RS	RS	PS	FI	FI	AM	AM	AM	AM	AM	AM	AM	AM	XX	XX	AM	AM	AM	DR	AM	XX	99
OX-0196	CC(C)CC(=O)NCCc1ccc(S(=O)(=O)N2CCN(C3CCCCC3)C2=N)cc1	13	1	RS	RS	RS	RS	RS	RS	RS	TS	RS	RS	RS	RS	RS	RS	RS	RS	PS	PS	CT	CT	XX	XX	XX	XX	XX	XX	XX	CT	XX	XX	CT	XX	AM	CT	XX	XX	99
OX-0197	N=C1N(C2CCCCC2)CCN1S(=O)(=O)c1ccc(CCNC(=O)Oc2ccccc2)cc1	13	2	RS	RS	RS	RS	RS	RS	RS	PS	RS	RS	TS	KS	TS	RS	RS	RS	PS	PS	AM	XX	XX	XX	AM	AM	YX	YX	AM	XX	XX	XX	XX	XX	AM	CT	YX	YX	90
OX-0198	COc1cccc(C(=O)NCCc2ccc(S(=O)(=O)N3CCN(C4CCCCC4)C3=N)cc2)c1	13	3	RS	RS	RS	RS	RS	RS	RS	PS	RS	RS	TS	KS	RS	RS	RS	RS	PS	PS	XX	FI	XX	XX	AM	AM	XX	XX	FI	XX	XX	XX	FI	XX	AM	CT	YX	YX	99
OX-0199	N=C1N(C2CCCCC2)CCN1S(=O)(=O)c1ccc(N)cc1	13	4	RS	RS	RS	RS	RS	RS	RS	PS	RS	RS	PS	KS	RS	RS	RS	RS	PS	PS	FI	CT	XX	XX	XX	XX	XX	XX	XX	XX	XX	CT	XX	XX	AM	XX	XX	XX	99
OX-0200	CC1(C(=O)NCCc2ccc(S(=O)(=O)N3CCN(C4CCCCC4)C3=N)cc2)CC=CCC1	13	5	RS	RS	RS	RS	RS	RS	RS	PS	RS	RS	TS	KS	RS	RS	RS	RS	RS	PS	FI	CT	XX	XX	CT	AM	XX	YX	XX	AM	CT	AM	CT	CT	AM	CT	CT	DR	99
OX-0201	CC(C(=O)NCCc1ccc(S(=O)(=O)N2CCN(C3CCCCC3)C2=N)cc1)N(C)C	13	6	RS	RS	RS	RS	RS	RS	TS	PS	RS	RS	TS	RS	RS	TS	RS	RS	RS	PS	AM	AM	AM	AM	XX	CT	XX	CT	CT	AM	XX	CT	CT	CT	AM	AM	XX	DR	82
OX-0202	CCCCC(=O)NCCc1ccc(S(=O)(=O)N2CCN(C3CCCCC3)C2=N)cc1	13	7	RS	RS	RS	RS	RS	RS	KS	PS	RS	RS	RS	RS	RS	RS	RS	RS	PS	PS	XX	CT	XX	XX	CT	CT	XX	XX	XX	DR	XX	XX	XX	XX	AM	XX	XX	XX	99
OX-0203	N=C1N(C2CCCCC2)CCN1S(=O)(=O)c1ccc(CCNC(=O)C2CC2)cc1	13	8	RS	RS	RS	RS	RS	RS	RS	TS	RS	RS	TS	RS	RS	RS	RS	RS	TS	PS	AM	CT	XX	XX	CT	CT	XX	XX	CT	CT	XX	XX	CT	XX	AM	CT	YX	YX	99
OX-0204	N=C1N(C2CCCCC2)CCN1S(=O)(=O)c1ccc(CCNC(=S)NC2CCCCC2)cc1	13	9	TS	TS	TS	RS	RS	PS	PS	PS	RS	RS	PS	TS	TS	TS	TS	KS	PS	PS	XX	XX	XX	XX	XX	XX	CT	DR	XX	XX	YX	XX	CT	CT	AM	CT	DR	DR	99
OX-0205	C/C=C\C(=O)NCCc1ccc(S(=O)(=O)N2CCN(C3CCCCC3)C2=N)cc1	13	10	RS	RS	RS	RS	RS	RS	RS	TS	RS	RS	RS	RS	RS	RS	RS	RS	TS	PS	AM	AM	AM	AM	AM	AM	AM	YX	AM	CT	XX	AM	AM	AM	AM	AM	XX	DR	99
OX-0206	COCC(=O)NCCc1ccc(S(=O)(=O)N2CCN(C3CCCCC3)C2=N)cc1	13	11	RS	RS	TS	TS	RS	PS	PS	PS	KS	RS	PS	TS	RS	RS	RS	PS	PS	PS	AM	XX	XX	AM	XX	CT	DR	DR	YX	XX	DR	XX	XX	XX	AM	XX	DR	DR	0
OX-0207	CCSCC(=O)NCCc1ccc(S(=O)(=O)N2CCN(C3CCCCC3)C2=N)cc1	13	12	RS	RS	RS	RS	RS	TS	KS	TS	RS	RS	PS	KS	RS	RS	RS	TS	PS	PS	CT	CT	XX	CT	XX	XX	XX	YX	CT	CT	CT	XX	CT	CT	AM	CT	DR	DR	99
OX-0208	CCCOCC(=O)NCCc1ccc(S(=O)(=O)N2CCN(C3CCCCC3)C2=N)cc1	13	13	RS	RS	RS	RS	RS	RS	RS	RS	RS	RS	RS	RS	RS	RS	RS	RS	RS	TS	CT	CT	CT	CT	CT	AM	CT	XX	CT	CT	CT	AM	CT	AM	AM	CT	XX	XX	99
OX-0209	N=C1N(C2CCCCC2)CCN1S(=O)(=O)c1ccc(CCNC(=S)Nc2ccccc2)cc1	13	14	TS	TS	TS	TS	RS	PS	PS	PS	RS	RS	PS	TS	TS	TS	RS	RS	PS	PS	XX	XX	XX	XX	XX	YX	YX	YX	XX	XX	YX	XX	XX	XX	AM	XX	YX	YX	99
OX-0210	N=C1N(C2CCCCC2)CCN1S(=O)(=O)c1ccc(CCNC(=O)c2cnccn2)cc1	13	15	RS	KS	RS	RS	RS	TS	TS	PS	RS	RS	PS	RS	TS	RS	RS	RS	PS	PS	CT	XX	XX	XX	CT	XX	XX	YX	CT	XX	CT	XX	XX	XX	AM	CT	YX	YX	99
OX-0211	CC(C)/C=C/C(=O)NCCc1ccc(S(=O)(=O)N2CCN(C3CCCCC3)C2=N)cc1	13	16	RS	RS	RS	RS	RS	KS	KS	PS	RS	RS	RS	RS	RS	RS	RS	RS	PS	PS	CT	XX	XX	XX	CT	CT	XX	YX	XX	XX	CT	XX	CT	XX	AM	CT	YX	YX	99
OX-0212	N=C1N(C2CCCCC2)CCN1S(=O)(=O)c1ccc(CCNC(=O)c2ccccn2)cc1	13	17	RS	RS	TS	PS	TS	PS	PS	PS	KS	RS	PS	TS	TS	TS	RS	RS	PS	PS	FI	FI	XX	XX	AM	AM	YX	DR	CT	YX	YX	XX	XX	YX	AM	XX	DR	DR	0
OX-0213	CCCCN(C)C(=O)NCCc1ccc(S(=O)(=O)N2CCN(C3CCCCC3)C2=N)cc1	13	18	RS	RS	RS	RS	RS	RS	RS	TS	RS	RS	RS	RS	RS	RS	RS	RS	PS	PS	FI	FI	XX	AM	AM	AM	XX	XX	AM	AM	XX	FI	FI	FI	AM	AM	YX	DR	99
OX-0214	CCCCOC(=O)NCCc1ccc(S(=O)(=O)N2CCN(C3CCCCC3)C2=N)cc1	13	19	RS	RS	RS	RS	RS	RS	RS	RS	RS	RS	RS	RS	RS	RS	RS	RS	RS	PS	DR	FI	XX	AM	DR	DR	XX	CT	CT	CT	XX	AM	CT	XX	AM	CT	XX	XX	99
OX-0215	Cc1cc(C(=O)NCCc2ccc(S(=O)(=O)N3CCN(C4CCCCC4)C3=N)cc2)no1	13	20	RS	RS	RS	RS	RS	RS	RS	TS	RS	RS	RS	RS	RS	RS	RS	RS	PS	PS	CT	XX	CT	CT	FI	AM	XX	YX	CT	XX	CT	CT	XX	AM	AM	DR	XX	DR	99
OX-0216	CCNC(=S)NCCc1ccc(S(=O)(=O)N2CCN(C3CCCCC3)C2=N)cc1	13	21	RS	RS	RS	RS	RS	KS	TS	PS	RS	RS	PS	RS	TS	RS	PS	RS	PS	PS	FI	CT	XX	XX	AM	AM	XX	YX	AM	FI	XX	XX	XX	XX	AM	CT	YX	YX	99
OX-0217	CCCS(=O)CC(=O)NCCc1ccc(S(=O)(=O)N2CCN(C3CCCCC3)C2=N)cc1	13	22	RS	RS	RS	RS	RS	RS	PS	TS	RS	RS	RS	RS	RS	RS	RS	RS	PS	PS	AM	AM	AM	AM	AM	AM	AM	DR	AM	AM	AM	AM	AM	AM	AM	AM	AM	DR	0
OX-0218	CCOC(=O)NCCc1ccc(S(=O)(=O)N2CCN(C3CCCCC3)C2=N)cc1	13	23	RS	RS	RS	RS	RS	RS	RS	PS	RS	RS	TS	RS	RS	RS	RS	RS	PS	PS	FI	FI	AM	AM	AM	AM	DR	CT	AM	AM	XX	FI	FI	AM	AM	AM	CT	YX	85
OX-0219	CC(=O)NCCc1ccc(S(=O)(=O)N2CCN(C3CCCCC3)C2=N)cc1	13	24	RS	RS	RS	RS	RS	TS	TS	PS	RS	RS	TS	NA	KS	TS	RS	RS	PS	PS	XX	XX	XX	XX	XX	XX	XX	XX	XX	XX	XX	NA	XX	XX	XX	AM	YX	YX	99
OX-0220	N=C1N(C2CCCCC2)CCN1S(=O)(=O)c1ccc(CCNC(N)=O)cc1	13	25	RS	RS	RS	RS	RS	TS	PS	PS	RS	RS	PS	RS	RS	KS	RS	RS	PS	PS	AM	AM	XX	XX	AM	AM	CT	CT	AM	XX	DR	XX	XX	XX	AM	CT	DR	DR	99
OX-0221	N=C1N(C2CCCCC2)CCN1S(=O)(=O)c1ccc(CCNC=O)cc1	13	26	RS	RS	RS	RS	RS	RS	RS	PS	RS	RS	TS	RS	RS	RS	RS	RS	PS	PS	FI	AM	XX	AM	AM	AM	CT	CT	AM	CT	XX	AM	AM	XX	AM	DR	YX	DR	99
OX-0222	Cc1ccccc1C(=O)NCCc1ccc(S(=O)(=O)N2CCN(C3CCCCC3)C2=N)cc1	13	27	RS	RS	RS	RS	RS	RS	TS	PS	RS	RS	PS	RS	TS	RS	RS	RS	PS	PS	XX	XX	XX	XX	XX	CT	XX	CT	XX	CT	XX	XX	XX	XX	AM	CT	CT	CT	99
OX-0223	COc1ccccc1C(=O)NCCc1ccc(S(=O)(=O)N2CCN(C3CCCCC3)C2=N)cc1	13	28	RS	RS	RS	RS	RS	RS	TS	PS	RS	RS	RS	RS	TS	RS	RS	RS	PS	PS	FI	CT	XX	XX	CT	CT	XX	YX	XX	CT	XX	XX	XX	XX	AM	CT	YX	YX	99
OX-0224	CSCCC(=O)NCCc1ccc(S(=O)(=O)N2CCN(C3CCCCC3)C2=N)cc1	13	29	RS	RS	RS	RS	RS	TS	TS	PS	RS	RS	PS	RS	TS	TS	RS	RS	PS	PS	CT	XX	XX	XX	CT	XX	XX	YX	CT	CT	XX	XX	XX	XX	AM	CT	YX	YX	99
OX-0225	N=C1N(C2CCCCC2)CCN1S(=O)(=O)c1ccc(CCNC(=O)/C=C/c2ccccc2)cc1	13	30	RS	RS	RS	RS	RS	TS	TS	PS	RS	RS	TS	RS	KS	RS	RS	RS	PS	PS	XX	XX	XX	CT	XX	CT	YX	DR	CT	YX	YX	XX	CT	XX	AM	CT	YX	DR	99
OX-0226	N=C1N(C2CCCCC2)CCN1S(=O)(=O)c1ccc(CCNC(=S)NC2CCCC2)cc1	13	31	KS	KS	TS	TS	RS	PS	PS	PS	RS	RS	PS	TS	PS	TS	RS	RS	PS	PS	XX	XX	CT	CT	CT	YX	CT	YX	AM	XX	YX	XX	NA	CT	AM	XX	YX	DR	99
OX-0227	N=C1N(C2CCCCC2)CCN1S(=O)(=O)c1ccc(CCNC(=O)c2ccccc2)cc1	13	32	RS	RS	RS	RS	RS	RS	RS	PS	RS	RS	TS	RS	KS	RS	RS	RS	PS	PS	XX	XX	XX	XX	AM	XX	XX	YX	YX	XX	XX	XX	XX	XX	YX	XX	YX	XX	99
OX-0228	CCS(=O)CC(=O)NCCc1ccc(S(=O)(=O)N2CCN(C3CCCCC3)C2=N)cc1	13	33	RS	RS	RS	RS	RS	TS	PS	PS	RS	RS	PS	RS	RS	TS	RS	RS	PS	PS	AM	XX	XX	AM	AM	AM	CT	YX	AM	AM	XX	XX	XX	XX	AM	AM	DR	DR	99
OX-0229	CCS(=O)CCC(=O)NCCc1ccc(S(=O)(=O)N2CCN(C3CCCCC3)C2=N)cc1	13	34	RS	RS	RS	TS	RS	PS	PS	PS	RS	RS	PS	RS	RS	RS	RS	RS	PS	PS	AM	AM	CT	AM	AM	AM	CT	DR	AM	AM	DR	CT	CT	CT	AM	AM	DR	DR	80
OX-0230	N=C1N(C2CCCCC2)CCN1S(=O)(=O)c1ccc(CCNC(=O)c2ccco2)cc1	13	35	RS	RS	RS	RS	RS	RS	KS	PS	RS	RS	RS	RS	RS	RS	RS	RS	PS	PS	AM	AM	XX	AM	AM	AM	XX	YX	AM	CT	YX	XX	AM	YX	AM	CT	XX	DR	99
OX-0231	CCC(CC)C(=O)NCCc1ccc(S(=O)(=O)N2CCN(C3CCCCC3)C2=N)cc1	13	36	RS	RS	RS	RS	RS	RS	RS	PS	RS	RS	PS	RS	RS	RS	RS	RS	PS	PS	CT	CT	XX	XX	CT	CT	XX	CT	CT	CT	CT	XX	CT	XX	AM	CT	YX	DR	99
OX-0232	N=C1N(C2CCCCC2)CCN1S(=O)(=O)c1ccc(CCNC(=O)Nc2ccccc2)cc1	13	37	TS	TS	TS	TS	RS	TS	PS	PS	RS	RS	PS	TS	TS	TS	RS	TS	PS	PS	XX	XX	XX	XX	CT	AM	YX	DR	CT	XX	DR	XX	XX	XX	AM	CT	DR	DR	99
OX-0233	N=C1N(C2CCCCC2)CCN1S(=O)(=O)c1ccc(CCNC(=O)C2CC=CCC2)cc1	13	38	RS	RS	TS	RS	RS	TS	TS	PS	RS	RS	PS	RS	TS	TS	RS	RS	PS	PS	CT	CT	CT	CT	XX	CT	YX	DR	XX	CT	DR	CT	CT	XX	AM	CT	DR	DR	99
OX-0234	CSCC(=O)NCCc1ccc(S(=O)(=O)N2CCN(C3CCCCC3)C2=N)cc1	13	39	RS	RS	RS	RS	RS	KS	RS	PS	RS	RS	RS	RS	RS	RS	RS	RS	PS	PS	AM	AM	XX	CT	CT	XX	XX	XX	CT	AM	XX	CT	AM	CT	AM	CT	XX	XX	99
OX-0235	CCCC(=O)NCCc1ccc(S(=O)(=O)N2CCN(C3CCCCC3)C2=N)cc1	13	40	NA	NA	NA	NA	NA	NA	NA	NA	NA	NA	NA	NA	NA	NA	NA	NA	NA	NA	NA	NA	NA	NA	NA	NA	NA	NA	NA	NA	NA	NA	NA	NA	NA	NA	NA	NA	NA
OX-0236	CCCCNC(=S)NCCc1ccc(S(=O)(=O)N2CCN(C3CCCCC3)C2=N)cc1	13	41	RS	RS	TS	TS	RS	RS	PS	PS	RS	RS	PS	RS	TS	RS	PS	RS	PS	PS	XX	AM	XX	XX	XX	XX	XX	YX	CT	XX	YX	FI	XX	DR	AM	CT	YX	YX	99
OX-0237	CNC(=S)NCCc1ccc(S(=O)(=O)N2CCN(C3CCCCC3)C2=N)cc1	13	42	RS	TS	TS	RS	RS	TS	TS	PS	RS	RS	PS	TS	TS	KS	PS	RS	PS	PS	AM	XX	XX	XX	XX	DR	YX	YX	CT	XX	YX	XX	XX	XX	AM	XX	YX	DR	99
OX-0238	CS(=O)CCC(=O)NCCc1ccc(S(=O)(=O)N2CCN(C3CCCCC3)C2=N)cc1	13	43	RS	RS	RS	TS	RS	TS	PS	PS	RS	RS	PS	RS	RS	TS	RS	RS	PS	PS	AM	AM	XX	XX	AM	AM	CT	DR	YX	CT	CT	XX	XX	CT	AM	XX	DR	DR	99
OX-0239	COc1ccc(C(=O)NCCc2ccc(S(=O)(=O)N3CCN(C4CCCCC4)C3=N)cc2)cc1	13	44	KS	TS	RS	RS	RS	TS	PS	PS	RS	RS	PS	KS	TS	TS	RS	RS	PS	NA	XX	XX	XX	XX	XX	XX	XX	YX	CT	CT	XX	XX	XX	XX	AM	CT	XX	NA	99
OX-0240	N=C1N(C2CCCCC2)CCN1S(=O)(=O)c1ccc(CCNC(=O)c2cccnc2)cc1	13	45	RS	RS	TS	RS	RS	TS	PS	PS	RS	RS	PS	RS	TS	KS	RS	RS	RS	PS	CT	XX	XX	XX	XX	XX	CT	YX	XX	XX	XX	XX	XX	XX	AM	CT	DR	DR	99
OX-0241	CCCCCCNC(=S)NCCc1ccc(S(=O)(=O)N2CCN(C3CCCCC3)C2=N)cc1	13	46	RS	RS	RS	RS	RS	KS	TS	PS	RS	RS	RS	RS	RS	RS	RS	RS	PS	PS	FI	FI	XX	XX	CT	XX	XX	XX	CT	CT	XX	FI	CT	FI	AM	CT	XX	XX	86
OX-0242	CN(C)CC(=O)NCCc1ccc(S(=O)(=O)N2CCN(C3CCCCC3)C2=N)cc1	13	47	RS	RS	RS	RS	RS	PS	PS	PS	RS	RS	RS	RS	RS	PS	RS	RS	PS	PS	CT	AM	AM	CT	AM	AM	DR	XX	AM	AM	AM	DR	DR	DR	DR	AM	XX	YX	99
OX-0243	CCC/C=C/C(=O)NCCc1ccc(S(=O)(=O)N2CCN(C3CCCCC3)C2=N)cc1	13	48	RS	RS	RS	RS	RS	TS	TS	PS	RS	RS	TS	RS	RS	RS	RS	RS	PS	PS	CT	CT	XX	XX	CT	XX	XX	XX	CT	CT	XX	XX	CT	XX	CT	CT	XX	YX	99
OX-0244	N=C1N(C2CCCCC2)CCN1S(=O)(=O)c1ccc(CCNC(=O)c2ccc[n+]([O-])c2)cc1	13	49	RS	TS	PS	PS	RS	PS	PS	PS	RS	NA	PS	PS	KS	PS	PS	PS	PS	PS	FI	CT	CT	FI	AM	AM	CT	CT	AM	NA	CT	XX	CT	CT	AM	AM	DR	CT	22
OX-0245	CC(Nc1ccccc1)C(=O)NCCc1ccc(S(=O)(=O)N2CCN(C3CCCCC3)C2=N)cc1	13	50	RS	TS	RS	TS	RS	PS	PS	NA	RS	RS	PS	KS	PS	TS	RS	RS	PS	PS	XX	XX	XX	XX	XX	CT	CT	NA	XX	CT	DR	XX	CT	XX	DR	DR	DR	DR	99
OX-0246	Cc1cnc(C(=O)NCCc2ccc(S(=O)(=O)N3CCN(C4CCCCC4)C3=N)cc2)cn1	13	51	RS	RS	RS	RS	RS	PS	PS	PS	RS	RS	PS	RS	TS	PS	TS	TS	PS	PS	AM	CT	CT	CT	AM	CT	CT	DR	CT	AM	CT	CT	CT	CT	CT	AM	DR	DR	99
OX-0247	N=C1N(C2CCCCC2)CCN1S(=O)(=O)c1ccc(CCNC(=O)CCNc2ccccc2)cc1	13	52	RS	RS	PS	PS	RS	PS	PS	PS	RS	RS	PS	RS	RS	PS	PS	PS	PS	PS	AM	FI	FI	FI	AM	AM	CT	DR	AM	FI	YX	FI	XX	AM	AM	FI	DR	DR	41
OX-0248	CCCCC(=O)N(CCOC)Cc1ccc(-c2ccccc2-c2nnn[nH]2)cc1	14	1	RS	RS	RS	RS	RS	RS	RS	PS	RS	RS	PS	RS	RS	RS	RS	RS	RS	PS	CT	XX	XX	XX	AM	XX	XX	XX	AM	YX	XX	XX	XX	XX	XX	CT	XX	YX	99
OX-0249	COC(=O)N(Cc1ccc(-c2ccccc2-c2nnn[nH]2)cc1)[C@H](C(=O)O)C(C)C	14	2	RS	RS	RS	RS	RS	RS	RS	RS	RS	RS	TS	RS	RS	RS	RS	RS	RS	PS	FI	FI	AM	FI	AM	AM	AM	AM	AM	AM	AM	FI	AM	AM	AM	AM	AM	DR	99
OX-0250	CCCCC(=O)N(Cc1ccc(-c2ccccc2-c2nnn[nH]2)cc1)[C@H](C(=O)OC)C(C)C	14	3	RS	RS	RS	RS	RS	RS	RS	RS	RS	RS	RS	RS	RS	RS	RS	RS	RS	PS	AM	FI	AM	FI	AM	AM	AM	AM	AM	AM	AM	AM	AM	AM	AM	AM	AM	DR	99
OX-0251	CCCCC(=O)N(Cc1ccc(-c2ccccc2-c2nnn[nH]2)cc1)[C@H](C(=O)NC)C(C)C	14	4	RS	RS	RS	RS	RS	RS	RS	PS	RS	RS	PS	RS	RS	RS	RS	RS	PS	PS	DR	FI	XX	XX	AM	XX	XX	YX	XX	DR	YX	XX	YX	XX	YX	DR	YX	DR	99
OX-0252	CCCCC(=O)N(Cc1ccc(-c2ccccc2-c2nnn[nH]2)cc1)Cc1cccnc1	14	5	RS	RS	RS	RS	RS	RS	TS	PS	RS	RS	PS	TS	RS	RS	RS	RS	PS	PS	FI	FI	XX	XX	AM	XX	XX	YX	XX	AM	YX	XX	DR	XX	XX	XX	YX	YX	99
OX-0253	CCCCC(=O)N(Cc1ccc(-c2ccccc2-c2nnn[nH]2)cc1)[C@@H](CC(C)C)C(=O)O	14	6	RS	RS	RS	RS	RS	RS	RS	RS	RS	RS	RS	RS	RS	RS	RS	RS	RS	PS	AM	AM	AM	AM	AM	AM	AM	AM	AM	AM	AM	AM	AM	AM	AM	AM	AM	DR	99
OX-0254	CCCCC(=O)N(CC(=O)O)Cc1ccc(-c2ccccc2-c2nnn[nH]2)cc1	14	7	NA	NA	NA	NA	NA	NA	NA	NA	NA	NA	NA	NA	NA	NA	NA	NA	NA	NA	NA	NA	NA	NA	NA	NA	NA	NA	NA	NA	NA	NA	NA	NA	NA	NA	NA	NA	NA
OX-0255	CCCCN(Cc1ccc(-c2ccccc2-c2nnn[nH]2)cc1)C(=O)[C@@H](NS(C)(=O)=O)C(C)C	14	8	RS	RS	RS	RS	RS	RS	RS	RS	RS	RS	RS	RS	RS	RS	RS	RS	PS	PS	AM	FI	FI	AM	AM	AM	FI	AM	AM	AM	AM	AM	FI	FI	FI	AM	FI	DR	73
OX-0256	CCCCC(=O)N(Cc1ccc2cc(-c3ccccc3-c3nnn[nH]3)ccc2c1)[C@H](C(=O)O)C(C)C	14	9	RS	RS	RS	RS	RS	RS	RS	RS	RS	TS	RS	RS	RS	RS	RS	RS	RS	PS	FI	FI	AM	AM	AM	AM	AM	AM	FI	AM	AM	AM	AM	AM	AM	AM	AM	DR	99
OX-0257	CCCCC(=O)N(Cc1ccc(-c2ccccc2-c2nnn[nH]2)cc1)[C@H](C(=O)OC)[C@@H](C)CC	14	10	RS	RS	RS	RS	RS	RS	RS	PS	RS	RS	RS	RS	RS	RS	RS	RS	PS	PS	FI	FI	FI	FI	AM	AM	AM	AM	AM	AM	FI	FI	AM	AM	AM	AM	AM	DR	86
OX-0258	CCCCC(=O)N(Cc1ccc(-c2cccc(-c3nnn[nH]3)c2)cc1)[C@H](C(=O)O)C(C)C	14	11	NA	NA	NA	NA	NA	NA	NA	NA	NA	NA	NA	NA	NA	NA	NA	NA	NA	NA	NA	NA	NA	NA	NA	NA	NA	NA	NA	NA	NA	NA	NA	NA	NA	NA	NA	NA	NA
OX-0259	CCCCC(=O)N(Cc1ccc2nc(-c3ccccc3-c3nnn[nH]3)ccc2c1)C(C(=O)O)C(C)C	14	12	RS	RS	PS	PS	RS	PS	RS	PS	TS	PS	PS	PS	RS	PS	PS	PS	PS	PS	AM	XX	DR	AM	AM	AM	AM	DR	DR	DR	DR	AM	YX	DR	AM	DR	DR	DR	66
OX-0260	CCCCC(=O)N(Cc1ccc2sc(-c3ccccc3-c3nnn[nH]3)cc2c1)C(C(=O)O)C(C)C	14	13	RS	RS	PS	PS	RS	PS	PS	PS	TS	TS	PS	PS	RS	PS	RS	RS	PS	PS	AM	FI	AM	AM	AM	AM	AM	DR	AM	AM	DR	FI	FI	AM	AM	AM	FI	DR	99
OX-0261	CCCCC(=O)N(Cc1ccc(-c2ccccc2-c2nnn[nH]2)cc1)[C@H](C(=O)N(C)C)C(C)C	14	14	RS	RS	RS	RS	RS	RS	RS	PS	RS	RS	PS	RS	RS	RS	RS	KS	PS	PS	AM	AM	XX	XX	AM	XX	XX	YX	XX	AM	YX	FI	XX	XX	XX	CT	YX	DR	99
OX-0262	CCCCC(=O)N(CCOCc1ccccc1)Cc1ccc(-c2ccccc2-c2nnn[nH]2)cc1	14	15	RS	TS	TS	RS	RS	TS	RS	PS	TS	RS	PS	RS	TS	RS	RS	RS	PS	PS	FI	FI	XX	FI	AM	XX	XX	DR	XX	AM	DR	XX	FI	FI	FI	AM	DR	DR	99
OX-0263	CCCCC(=O)N(Cc1ccc(-c2ccccc2-c2nnn[nH]2)cc1)[C@@H](CC)C(=O)O	14	16	RS	RS	RS	RS	RS	RS	RS	PS	RS	RS	RS	RS	RS	RS	RS	RS	PS	PS	AM	FI	AM	AM	AM	AM	AM	AM	AM	AM	AM	AM	AM	AM	AM	AM	AM	DR	99
OX-0264	CCCCC(=O)N(Cc1ccc(-c2ccccc2-c2nnn[nH]2)cc1)[C@@H](CC1CCCCC1)C(=O)O	14	17	RS	RS	PS	RS	RS	RS	TS	PS	RS	RS	RS	RS	RS	RS	RS	RS	PS	PS	DR	DR	DR	FI	AM	AM	FI	AM	DR	DR	FI	FI	FI	FI	AM	AM	AM	DR	99
OX-0265	CCCCC(=O)N(Cc1ccc(-c2ccccc2-c2nnn[nH]2)cc1)C(C)(C)C(=O)O	14	18	RS	RS	TS	RS	RS	RS	TS	PS	PS	RS	TS	TS	RS	RS	RS	RS	PS	PS	AM	AM	AM	FI	AM	FI	AM	AM	AM	AM	DR	AM	FI	AM	AM	AM	AM	DR	99
OX-0266	CCCCC(=O)N(Cc1ccc(-c2ccccc2-c2nnn[nH]2)cc1)[C@@H](C(=O)OC)C(C)C	14	19	NA	NA	NA	NA	NA	NA	NA	NA	NA	NA	NA	NA	NA	NA	NA	NA	NA	NA	NA	NA	NA	NA	NA	NA	NA	NA	NA	NA	NA	NA	NA	NA	NA	NA	NA	NA	NA
OX-0267	CCCCN(Cc1ccc(-c2ccccc2-c2nnn[nH]2)cc1)C(=O)CC1(C(=O)O)CCCC1	14	20	RS	RS	PS	PS	RS	PS	PS	PS	RS	RS	PS	PS	PS	PS	TS	RS	PS	PS	DR	FI	FI	FI	FI	DR	DR	DR	AM	AM	DR	FI	AM	FI	DR	AM	AM	DR	66
OX-0268	CCCCC(=O)N(Cc1ccc(-c2ccccc2-c2nnn[nH]2)cc1)[C@@H](CCc1ccccc1)C(=O)O	14	21	RS	RS	TS	RS	RS	RS	PS	PS	RS	RS	PS	RS	RS	RS	RS	KS	PS	PS	AM	AM	AM	AM	AM	AM	AM	AM	AM	AM	AM	AM	FI	AM	AM	AM	AM	DR	99
OX-0269	CCCCS(=O)(=O)N(Cc1ccc(-c2ccccc2-c2nnn[nH]2)cc1)[C@@H](C)C(=O)O	14	22	RS	RS	TS	RS	RS	RS	KS	PS	PS	PS	PS	RS	RS	RS	RS	PS	PS	PS	FI	FI	XX	FI	AM	XX	XX	YX	DR	YX	DR	XX	AM	XX	AM	YX	YX	DR	99
OX-0270	CCOC(=O)N(Cc1ccc(-c2ccccc2-c2nnn[nH]2)cc1)[C@H](C(=O)O)C(C)C	14	23	RS	RS	RS	RS	RS	RS	RS	RS	RS	RS	RS	RS	RS	RS	RS	RS	RS	PS	FI	FI	FI	FI	FI	FI	FI	FI	DR	DR	AM	FI	FI	FI	FI	CT	AM	DR	99
OX-0271	CCCC(=O)N(Cc1ccc(-c2ccccc2-c2nnn[nH]2)cc1)C(C)(C)C(=O)O	14	24	RS	RS	PS	RS	RS	PS	PS	PS	PS	PS	PS	TS	RS	KS	RS	PS	PS	PS	AM	AM	YX	XX	AM	XX	YX	YX	DR	DR	DR	CT	XX	XX	XX	DR	YX	DR	99
OX-0272	CCCCCC(=O)N(Cc1ccc(-c2ccccc2-c2nnn[nH]2)cc1)[C@@H](C)C(=O)O	14	25	RS	RS	RS	RS	RS	RS	RS	KS	RS	RS	RS	RS	RS	RS	RS	RS	RS	PS	AM	AM	AM	AM	AM	AM	AM	AM	AM	AM	AM	AM	AM	AM	AM	AM	AM	DR	99
OX-0273	CCCC(=O)N(Cc1ccc(-c2ccccc2-c2nnn[nH]2)cc1)[C@@H](C)C(=O)O	14	26	RS	RS	RS	RS	RS	RS	KS	RS	RS	RS	TS	RS	RS	RS	RS	RS	PS	PS	FI	AM	FI	AM	AM	AM	AM	AM	FI	FI	FI	AM	FI	AM	AM	AM	FI	DR	99
OX-0274	CCCCC(=O)N(Cc1ccc(-c2ccccc2-c2nnn[nH]2)cc1)[C@@H](CCC)C(=O)O	14	27	RS	RS	RS	RS	RS	RS	RS	RS	RS	RS	KS	RS	RS	RS	RS	RS	PS	PS	DR	FI	FI	FI	AM	AM	AM	AM	AM	AM	FI	FI	FI	FI	AM	AM	AM	DR	99
OX-0275	CCCCC(=O)N(Cc1ccc(-c2ccccc2-c2nnn[nH]2)cc1)C(C)(C)C(=O)OC	14	28	RS	RS	KS	RS	RS	RS	RS	RS	RS	RS	RS	RS	RS	RS	RS	RS	KS	PS	DR	AM	AM	AM	AM	AM	AM	AM	AM	AM	AM	AM	FI	AM	AM	AM	AM	DR	99
OX-0276	CCCCC(=O)N(CCNC(C)=O)Cc1ccc(-c2ccccc2-c2nnn[nH]2)cc1	14	29	RS	RS	RS	RS	RS	RS	RS	PS	RS	RS	RS	RS	RS	RS	RS	RS	PS	PS	AM	AM	AM	AM	AM	AM	AM	AM	AM	AM	AM	AM	AM	AM	AM	AM	DR	DR	99
OX-0277	CCCCC(=O)N(Cc1ccc(-c2ccccc2C(=O)O)cc1)[C@H](C(=O)O)C(C)C	14	30	RS	RS	RS	RS	RS	RS	RS	RS	RS	RS	RS	RS	RS	RS	RS	RS	RS	PS	AM	AM	AM	AM	AM	AM	AM	AM	AM	AM	AM	AM	AM	AM	AM	AM	AM	DR	99
OX-0278	CCCCC(=O)N(Cc1ccc(-c2ccccc2-c2nnn[nH]2)cc1)[C@H](CCC)C(=O)O	14	31	RS	RS	RS	RS	RS	RS	RS	KS	KS	RS	PS	RS	RS	RS	RS	RS	PS	PS	AM	AM	AM	AM	AM	AM	AM	AM	AM	AM	AM	AM	AM	AM	AM	AM	AM	DR	99
OX-0279	CCCCC(=O)N(Cc1ccc(-c2ccccc2-c2nnn[nH]2)cc1)[C@H](C)C(=O)O	14	32	NA	NA	NA	NA	NA	NA	NA	NA	NA	NA	NA	NA	NA	NA	NA	NA	NA	NA	NA	NA	NA	NA	NA	NA	NA	NA	NA	NA	NA	NA	NA	NA	NA	NA	NA	NA	NA
OX-0280	CCCCC(=O)N(Cc1ccc(-c2ccccc2-c2nnn[nH]2)cc1)[C@@H](Cc1ccccc1)C(=O)O	14	33	RS	RS	RS	RS	RS	RS	RS	RS	RS	RS	PS	KS	RS	RS	RS	RS	PS	PS	AM	AM	AM	AM	AM	AM	AM	AM	AM	AM	AM	AM	AM	AM	AM	AM	AM	DR	99
OX-0281	CCCC(=O)N(Cc1ccc2cc(-c3ccccc3-c3nnn[nH]3)ccc2c1)[C@H](C(=O)O)C(C)C	14	34	RS	RS	RS	RS	RS	RS	RS	PS	RS	RS	PS	TS	RS	RS	RS	RS	PS	PS	FI	FI	YX	AM	AM	AM	YX	AM	AM	AM	DR	AM	AM	AM	AM	AM	DR	DR	99
OX-0282	CCCCC(=O)N(Cc1ccc(-c2ccccc2-c2nnn[nH]2)cc1)[C@@H](C(=O)O)C(C)C	14	35	RS	RS	RS	RS	RS	RS	RS	RS	RS	RS	KS	RS	RS	RS	RS	TS	RS	PS	DR	DR	AM	AM	AM	AM	AM	AM	CT	CT	DR	FI	FI	AM	AM	CT	AM	DR	99
OX-0283	CCCCC(=O)N(Cc1ccc(-c2ccccc2-c2nnn[nH]2)cc1)[C@H](Cc1ccccc1)C(=O)O	14	36	RS	RS	RS	RS	RS	RS	RS	PS	RS	RS	PS	RS	RS	RS	RS	RS	PS	PS	AM	AM	AM	AM	AM	AM	AM	AM	AM	AM	AM	AM	AM	AM	AM	AM	AM	DR	99
OX-0284	CCCCC(=O)N(Cc1ccc(-c2ccccc2-c2nnn[nH]2)cc1)Cc1nnn[nH]1	14	37	RS	RS	PS	PS	RS	PS	PS	PS	PS	PS	PS	PS	PS	PS	PS	PS	PS	PS	AM	FI	DR	YX	AM	DR	DR	DR	DR	DR	DR	YX	XX	AM	CT	DR	DR	DR	99
OX-0285	CCCCC(=O)N(Cc1cccc(-c2ccccc2-c2nnn[nH]2)c1)[C@H](C(=O)O)C(C)C	14	38	RS	RS	RS	RS	RS	RS	RS	RS	RS	RS	PS	RS	RS	RS	RS	RS	RS	PS	AM	AM	AM	AM	AM	AM	AM	AM	AM	AM	AM	AM	AM	AM	AM	AM	AM	DR	85
OX-0286	CCCN(Cc1ccc(-c2ccccc2-c2nnn[nH]2)cc1)C(=O)CCC1(C(=O)O)CCCCC1	14	39	RS	RS	PS	PS	RS	RS	PS	PS	RS	RS	PS	PS	RS	KS	RS	RS	PS	PS	FI	FI	CT	YX	AM	XX	CT	CT	CT	AM	AM	FI	AM	XX	AM	AM	CT	DR	99
OX-0287	CCCCC(=O)N(CCCCCO)Cc1ccc(-c2ccccc2-c2nnn[nH]2)cc1	14	40	RS	RS	TS	RS	RS	TS	PS	PS	PS	RS	PS	RS	RS	KS	RS	RS	PS	PS	AM	AM	XX	CT	AM	XX	XX	YX	YX	CT	DR	XX	FI	XX	XX	CT	YX	DR	99
OX-0288	CCCCC(=O)N(Cc1ccc(-c2ccccc2-c2nnn[nH]2)cc1)C1(C(=O)O)CCCCC1	14	41	RS	RS	RS	RS	RS	RS	RS	RS	PS	RS	PS	RS	TS	RS	RS	RS	PS	PS	DR	DR	DR	DR	AM	AM	XX	AM	YX	DR	YX	FI	XX	XX	XX	AM	YX	YX	99
OX-0289	CCCCS(=O)(=O)N(Cc1ccc(-c2ccccc2-c2nnn[nH]2)cc1)CC(C)(C)C(=O)O	14	42	RS	RS	RS	RS	RS	RS	RS	PS	TS	RS	PS	RS	RS	RS	RS	RS	PS	PS	CT	CT	XX	CT	AM	XX	XX	XX	XX	XX	XX	XX	FI	XX	CT	XX	YX	DR	99
OX-0290	CCCCC(=O)N(Cc1ccc(-c2ccccc2-c2nnn[nH]2)cc1)C(C(=O)O)c1ccccc1	14	43	RS	RS	PS	RS	RS	TS	TS	PS	PS	PS	PS	RS	KS	RS	RS	PS	PS	PS	DR	AM	XX	AM	AM	XX	XX	DR	DR	YX	DR	XX	AM	XX	AM	XX	YX	DR	99
OX-0291	CCCCC(=O)N(Cc1ccc(-c2ccccc2-c2nnn[nH]2)cc1)[C@@H](CC(=O)O)C(=O)O	14	44	RS	RS	PS	PS	RS	PS	PS	KS	KS	PS	PS	PS	PS	PS	PS	PS	PS	PS	AM	AM	DR	AM	DR	DR	DR	DR	DR	DR	DR	DR	AM	DR	AM	DR	DR	DR	99
OX-0292	CCCN(Cc1ccc(-c2ccccc2-c2nnn[nH]2)cc1)C(=O)CC(CC)(CC)C(=O)O	14	45	RS	RS	RS	PS	PS	PS	PS	PS	PS	PS	PS	PS	PS	PS	PS	PS	PS	PS	CT	AM	DR	CT	XX	CT	DR	DR	DR	DR	DR	CT	DR	CT	CT	DR	CT	DR	26
OX-0293	CCCCS(=O)(=O)N(Cc1ccc(-c2ccccc2-c2nnn[nH]2)cc1)[C@H](C(=O)O)C(C)C	14	46	RS	RS	RS	RS	RS	RS	RS	RS	NA	RS	RS	RS	RS	RS	RS	RS	RS	PS	AM	DR	AM	AM	AM	DR	AM	AM	NA	AM	AM	AM	AM	FI	AM	AM	AM	DR	99
OX-0294	CCCOC(=O)N(Cc1ccc(-c2ccccc2-c2nnn[nH]2)cc1)[C@H](C(=O)O)C(C)C	14	47	RS	RS	RS	RS	RS	RS	RS	RS	RS	RS	RS	RS	RS	RS	RS	RS	RS	PS	AM	AM	AM	AM	AM	AM	AM	AM	AM	DR	AM	AM	FI	FI	FI	DR	FI	DR	99
OX-0295	CCCCC(=O)N(Cc1ccc(-c2ccccc2-c2nnn[nH]2)cc1)C(C)CC(=O)O	14	48	RS	RS	PS	RS	RS	RS	PS	PS	RS	PS	TS	PS	TS	TS	RS	PS	PS	PS	DR	FI	YX	XX	FI	YX	YX	YX	CT	YX	CT	YX	FI	XX	XX	CT	DR	DR	99
OX-0296	CCCCC(=O)N(Cc1ccc(-c2ccccc2-c2nnn[nH]2)cc1)CC(CC)(CC)C(=O)O	14	49	NA	NA	NA	NA	NA	NA	NA	NA	NA	NA	NA	NA	NA	NA	NA	NA	NA	NA	NA	NA	NA	NA	NA	NA	NA	NA	NA	NA	NA	NA	NA	NA	NA	NA	NA	NA	NA
OX-0297	NC(=O)c1cc(OCCNCC(O)COc2ccc(-c3nc(C(F)(F)F)cs3)cc2)ccc1O	15	1	PS	PS	PS	PS	RS	PS	PS	PS	PS	PS	PS	PS	PS	PS	TS	PS	PS	PS	DR	CT	DR	CT	DR	DR	CT	NA	DR	DR	DR	DR	DR	CT	DR	DR	DR	DR	99
OX-0298	NC(=O)c1cc(OCCNCC(O)COc2ccc(-c3nc(C(F)(F)F)c[nH]3)cc2)ccc1O	15	2	RS	TS	PS	TS	RS	PS	PS	PS	PS	PS	PS	PS	PS	RS	KS	PS	PS	PS	CT	CT	CT	CT	DR	AM	CT	DR	DR	DR	DR	CT	CT	DR	CT	DR	DR	DR	99
OX-0299	Cn1nc(-c2ccc(OCC(O)CNCCOc3ccc(O)c(C(N)=O)c3)cc2)nc1C(F)(F)F	15	3	PS	PS	PS	PS	RS	PS	PS	PS	PS	PS	PS	PS	PS	PS	TS	PS	PS	PS	CT	CT	CT	CT	CT	CT	CT	DR	DR	DR	DR	CT	CT	CT	CT	DR	DR	DR	99
OX-0300	Cn1cc(C(F)(F)F)nc1-c1ccc(OC[C@@H](O)CNCCOc2ccc(O)c(C(N)=O)c2)cc1	15	4	TS	PS	PS	TS	RS	PS	PS	PS	PS	PS	PS	PS	PS	TS	KS	PS	PS	PS	CT	DR	DR	DR	DR	CT	DR	DR	DR	DR	DR	DR	DR	CT	DR	DR	DR	DR	99
OX-0301	CN(c1ccc(OCC(O)CNCCOc2ccc(O)c(C(N)=O)c2)cc1)S(C)(=O)=O	15	5	RS	PS	RS	RS	RS	TS	TS	PS	PS	NA	PS	RS	PS	KS	RS	PS	PS	PS	XX	XX	XX	XX	CT	AM	XX	CT	DR	NA	YX	YX	YX	YX	CT	CT	YX	YX	99
OX-0302	CSc1nc(-c2ccc(OCC(O)CNCCOc3ccc(O)c(C(N)=O)c3)cc2)n(C)n1	15	6	PS	PS	PS	PS	RS	PS	PS	PS	PS	PS	PS	PS	PS	PS	PS	PS	PS	PS	CT	CT	CT	CT	XX	DR	CT	DR	YX	CT	CT	CT	CT	CT	CT	CT	DR	CT	99
OX-0303	COc1ccccc1C(O)CNCCOc1ccc(O)c(C(N)=O)c1	15	7	RS	TS	TS	TS	KS	TS	TS	PS	PS	PS	PS	TS	TS	KS	KS	PS	PS	PS	XX	XX	YX	YX	YX	AM	YX	YX	CT	CT	YX	YX	YX	YX	XX	CT	DR	DR	99
OX-0304	Cn1ccnc1-c1ccc(OCC(O)CNCCOc2ccc(O)c(C(N)=O)c2)cc1	15	8	RS	RS	PS	PS	RS	PS	PS	PS	PS	PS	PS	PS	PS	PS	PS	PS	PS	PS	CT	CT	CT	CT	DR	DR	DR	DR	DR	CT	DR	CT	CT	AM	DR	CT	DR	DR	99
OX-0305	Cc1nc(-c2ccc(OCC(O)CNCCOc3ccc(O)c(C(N)=O)c3)cc2)n(C)c1C	15	9	RS	TS	PS	PS	RS	PS	PS	PS	PS	PS	PS	PS	PS	PS	PS	PS	PS	PS	AM	CT	DR	CT	AM	AM	DR	DR	DR	DR	DR	AM	CT	AM	FI	DR	DR	DR	35
OX-0306	COc1ccc(CCC(O)CNCCOc2ccc(O)c(C(N)=O)c2)cc1	15	10	PS	PS	PS	KS	RS	PS	PS	PS	PS	PS	PS	PS	PS	KS	KS	PS	PS	PS	XX	XX	XX	XX	XX	XX	XX	XX	XX	XX	XX	XX	XX	CT	XX	XX	XX	XX	99
OX-0307	Cn1nnc(-c2ccc(OCC(O)CNCCOc3ccc(O)c(C(N)=O)c3)cc2)n1	15	11	TS	PS	PS	PS	RS	PS	PS	PS	PS	PS	PS	PS	PS	TS	TS	PS	PS	PS	DR	DR	DR	DR	XX	DR	DR	DR	DR	DR	DR	DR	DR	DR	DR	DR	DR	DR	99
OX-0308	NC(=O)c1cc(OCCNCC(O)COc2ccccc2-c2cc3ccccc3[nH]2)ccc1O	15	12	RS	RS	RS	RS	RS	RS	RS	PS	PS	PS	TS	RS	TS	RS	RS	PS	PS	PS	AM	CT	AM	AM	AM	XX	DR	AM	AM	AM	DR	AM	AM	AM	AM	CT	DR	DR	99
OX-0309	NC(=O)c1cc(OCCNCC(O)CCCCc2ccccc2)ccc1O	15	13	RS	RS	PS	TS	RS	PS	PS	PS	PS	PS	PS	PS	PS	TS	TS	PS	PS	PS	XX	XX	XX	CT	XX	CT	CT	CT	CT	YX	YX	CT	CT	XX	CT	YX	YX	YX	99
OX-0310	Cc1cc(C)nc(-c2ccc(OCC(O)CNCCOc3ccc(O)c(C(N)=O)c3)cc2)n1	15	14	PS	PS	PS	PS	TS	PS	PS	PS	PS	PS	PS	PS	PS	PS	PS	PS	PS	PS	DR	YX	YX	YX	CT	DR	DR	DR	DR	CT	DR	DR	DR	CT	YX	CT	DR	CT	99
OX-0311	COCCOc1cccc(OCC(O)CNCCOc2ccc(O)c(C(N)=O)c2)c1	15	15	TS	PS	TS	TS	RS	TS	PS	PS	PS	PS	PS	TS	PS	TS	TS	PS	PS	PS	CT	CT	CT	CT	DR	CT	CT	CT	YX	YX	YX	CT	CT	CT	CT	CT	YX	YX	99
OX-0312	CC(=O)Nc1ccc(OCC(O)CNCCOc2ccc(O)c(C(N)=O)c2)cc1	15	16	TS	PS	PS	PS	KS	PS	PS	PS	PS	PS	PS	PS	PS	PS	PS	PS	PS	PS	CT	CT	DR	DR	CT	DR	DR	DR	DR	DR	DR	DR	DR	DR	CT	DR	DR	DR	99
OX-0313	COc1ccccc1OCC(O)CNCCOc1ccc(O)c(C(N)=O)c1	15	17	TS	PS	PS	PS	RS	PS	PS	PS	PS	PS	PS	PS	PS	PS	PS	PS	PS	PS	CT	DR	DR	DR	CT	DR	CT	DR	DR	CT	DR	DR	CT	CT	CT	CT	DR	DR	99
OX-0314	NC(=O)c1cc(OCCNCC(O)COc2cccc(C(F)(F)F)c2)ccc1O	15	18	PS	PS	PS	PS	KS	PS	PS	PS	PS	PS	PS	PS	PS	PS	PS	PS	PS	PS	DR	DR	DR	DR	YX	DR	DR	DR	DR	DR	DR	DR	DR	CT	DR	DR	DR	DR	99
OX-0315	Cn1c(-c2ccc(OCC(O)CNCCOc3ccc(O)c(C(N)=O)c3)cc2)cccc1=O	15	19	KS	TS	PS	PS	RS	PS	PS	PS	PS	PS	PS	PS	PS	PS	TS	PS	PS	PS	CT	XX	YX	YX	CT	AM	CT	YX	YX	CT	YX	YX	CT	FI	YX	CT	YX	YX	99
OX-0316	CSc1ccc(OCC(O)CNCCOc2ccc(O)c(C(N)=O)c2)cc1C	15	20	TS	TS	TS	KS	RS	TS	PS	PS	PS	PS	PS	TS	PS	KS	RS	PS	PS	PS	DR	DR	XX	CT	XX	DR	CT	CT	CT	CT	CT	XX	DR	AM	CT	CT	CT	DR	99
OX-0317	Cc1cccnc1OCC(O)CNCCOc1ccc(O)c(C(N)=O)c1	15	21	TS	TS	PS	PS	RS	PS	PS	PS	PS	PS	PS	PS	PS	PS	TS	PS	PS	PS	DR	DR	DR	CT	DR	DR	CT	DR	DR	DR	DR	DR	CT	CT	CT	DR	DR	DR	99
OX-0318	CCCOc1ccccc1OCC(O)CNCCOc1ccc(O)c(C(N)=O)c1	15	22	TS	TS	PS	PS	RS	PS	TS	PS	PS	PS	PS	PS	PS	TS	KS	PS	PS	PS	DR	CT	YX	DR	CT	CT	CT	DR	DR	DR	DR	CT	CT	AM	CT	DR	DR	DR	99
OX-0319	C#CCOc1ccccc1OCC(O)CNCCOc1ccc(O)c(C(N)=O)c1	15	23	TS	TS	PS	TS	RS	PS	PS	PS	PS	PS	PS	PS	PS	PS	TS	PS	PS	PS	YX	CT	DR	CT	CT	DR	DR	DR	DR	DR	DR	CT	DR	CT	CT	DR	DR	DR	99
OX-0320	NC(=O)c1cc(OCCNCC(O)CCc2ccccc2)ccc1O	15	24	TS	TS	PS	TS	RS	PS	PS	PS	PS	PS	PS	PS	PS	TS	RS	PS	PS	PS	DR	CT	DR	CT	CT	CT	DR	DR	DR	DR	DR	DR	DR	CT	XX	DR	DR	DR	99
OX-0321	NC(=O)c1cc(OCCNCC(O)COc2cccc3ccccc23)ccc1O	15	25	RS	TS	PS	RS	RS	TS	TS	PS	PS	PS	PS	TS	PS	RS	RS	PS	PS	PS	CT	CT	CT	CT	CT	AM	AM	DR	DR	DR	DR	DR	DR	AM	AM	DR	DR	DR	99
OX-0322	COCCOc1ccc(OCC(O)CNCCCCOc2ccc(O)c(C(N)=O)c2)cc1	15	26	TS	TS	PS	TS	RS	PS	PS	PS	PS	PS	PS	PS	PS	TS	KS	PS	PS	PS	DR	DR	CT	CT	CT	AM	CT	DR	DR	DR	DR	CT	DR	AM	AM	DR	DR	DR	99
OX-0323	Cc1cc(OCC(O)CNCCOc2ccc(O)c(C(N)=O)c2)ccc1S(C)(=O)=O	15	27	TS	PS	PS	TS	RS	PS	PS	PS	PS	PS	PS	PS	PS	TS	TS	PS	PS	PS	CT	YX	CT	YX	XX	DR	DR	DR	DR	DR	DR	CT	DR	AM	CT	DR	DR	DR	99
OX-0324	NC(=O)c1cc(OCCNCC(O)COc2ccc(CCOCC3CC3)cc2)ccc1O	15	28	TS	PS	PS	TS	RS	TS	PS	PS	PS	PS	PS	PS	PS	TS	TS	PS	PS	PS	CT	CT	DR	DR	CT	CT	DR	DR	DR	DR	DR	CT	DR	CT	CT	DR	DR	DR	99
OX-0325	NC(=O)c1cc(OCCNCC(O)COc2ccccc2-n2cccc2)ccc1O	15	29	KS	TS	TS	RS	RS	PS	PS	PS	PS	PS	PS	PS	PS	KS	RS	PS	PS	PS	XX	XX	YX	YX	CT	AM	YX	DR	YX	DR	DR	CT	YX	AM	CT	DR	DR	DR	99
OX-0326	CC(=O)c1ccccc1OCC(O)CNCCOc1ccc(O)c(C(N)=O)c1	15	30	RS	TS	TS	RS	RS	PS	PS	PS	PS	PS	PS	TS	PS	RS	RS	PS	PS	PS	XX	XX	XX	AM	AM	AM	XX	DR	DR	XX	DR	XX	CT	AM	AM	XX	DR	DR	99
OX-0327	NC(=O)c1cc(OCCNCC(O)COc2ccccc2CNC(=O)NCCO)ccc1O	15	31	TS	PS	PS	PS	RS	PS	PS	PS	PS	PS	PS	PS	PS	PS	PS	PS	PS	PS	DR	DR	DR	DR	CT	DR	DR	DR	DR	DR	DR	DR	CT	DR	DR	DR	DR	DR	99
OX-0328	CS(=O)(=O)Nc1ccc(OCC(O)CNCCOc2ccc(O)c(C(N)=O)c2)cc1	15	32	PS	PS	PS	PS	RS	PS	PS	PS	PS	PS	PS	PS	PS	PS	PS	PS	PS	PS	CT	CT	CT	CT	CT	CT	DR	DR	DR	DR	CT	CT	DR	CT	CT	DR	DR	DR	99
OX-0329	COCCOc1ccc(OCC(O)CNCCOc2ccc(C(N)=O)c(O)c2)cc1	15	33	PS	PS	PS	PS	RS	PS	PS	PS	PS	PS	PS	PS	PS	PS	TS	PS	PS	PS	YX	YX	CT	DR	YX	DR	CT	DR	DR	DR	DR	CT	YX	YX	YX	DR	DR	DR	99
OX-0330	CCCCNC(=O)c1cc(OCCNCC(O)COc2ccc(OCCOC)cc2)ccc1O	15	34	KS	TS	RS	TS	RS	TS	TS	PS	PS	RS	PS	TS	PS	KS	RS	RS	PS	PS	CT	XX	XX	XX	CT	XX	XX	DR	CT	XX	CT	XX	XX	XX	XX	CT	DR	DR	99
OX-0331	Cc1cccc(OCC(O)CNCCOc2ccc(O)c(C(N)=O)c2)c1	15	35	TS	TS	TS	TS	RS	PS	PS	PS	PS	PS	PS	PS	PS	TS	TS	PS	PS	PS	DR	DR	DR	DR	XX	DR	DR	DR	DR	DR	DR	DR	DR	CT	DR	DR	DR	DR	99
OX-0332	CC(=O)NCc1ccc(OCC(O)CNCCOc2ccc(O)c(C(N)=O)c2)cc1	15	36	PS	PS	PS	PS	RS	PS	PS	PS	PS	PS	PS	PS	PS	PS	PS	PS	PS	PS	DR	DR	DR	DR	CT	DR	DR	DR	DR	DR	DR	DR	DR	DR	CT	DR	DR	DR	99
OX-0333	Cc1cc2c(OCC(O)CNCCOc3ccc(O)c(C(N)=O)c3)cccc2[nH]1	15	37	TS	TS	PS	TS	RS	PS	PS	PS	PS	PS	PS	PS	PS	PS	TS	PS	PS	PS	CT	CT	DR	DR	AM	CT	DR	DR	DR	DR	DR	DR	DR	DR	DR	DR	DR	DR	99
